# Supplementary material for: The Local Tumor Microbiome Is Associated with Survival in Late-Stage Colorectal Cancer Patients
Source: PubMed Central journal article supplement (PMC10269740; doi:10.1128/spectrum.05066-22), 2023-04-12
Supplement: spectrum.05066-22-s0001.pdf [file spectrum.05066-22-s0001.pdf]

## Supplemental tables

[Table S1. Patient characteristics in the cohort](#)

[Table S2. Per-Subject Predictors of the Microbiome in CTF ordination space](#)

[Table S3. ASVs separating tumor and normal tissue based on differential ranking](#)

Table S4. Effect of tissue type on beta diversity in an unpaired analysis

Table S5. Dissimilarity between normal and tumor tissue and survival

Table S6. Feature Ranks for tumor vs normal tissue, based on long survival

Table S7. Feature Ranks for interaction term (short survival in tumor tissue)

Table S8. Tumor rPCA PC 1 features-associated ASVs for the ALR calculation

Table S9. Tumor rPCA PC 2 associated features used in the ALR calculation

Table S10. STORMS check list

## Supplemental Figures

[Figure S1. A family level view of the microbiome](#)

[Figure S2. There is a strong individual effect on the microbiome](#)

[Figure S3. Metadata predictors of the microbiome in Compositional Tensor Factorization](#)

Figure S4. Subject aware techniques detect a consistent difference between tissue types and replicate associated taxa

[Figure S4. Survival separates individuals by tumor-associated rPCA quadrant](#)

Deleted:

Deleted:  
Microbiome

Deleted:  
tissue ba

Delet  
micro

Delet  
effect

Delet  
micro

Delet  
by tur

**Table S1. Patient characteristics in the cohort**

|                                                   |                                 | Short-term<br>survival (< 2<br>years) (n=50) | Long-term<br>survival (≥5 years)<br>(n=51) | Total (n=101) |
|---------------------------------------------------|---------------------------------|----------------------------------------------|--------------------------------------------|---------------|
| <u>Patient characteristics at time of surgery</u> |                                 |                                              |                                            |               |
| <b>Age, years</b>                                 |                                 |                                              |                                            |               |
|                                                   | <60                             | 6 (12.0)                                     | 9 (17.7)                                   | 15 (14.9)     |
|                                                   | 60-69                           | 11 (22.0)                                    | 19 (37.3)                                  | 30 (29.7)     |
|                                                   | 70-74                           | 16 (32.0)                                    | 10 (19.6)                                  | 26 (25.7)     |
|                                                   | ≥75                             | 17 (34.0)                                    | 13 (25.5)                                  | 30 (29.7)     |
| <b>Sex</b>                                        |                                 |                                              |                                            |               |
|                                                   | <i>Female</i>                   | 24 (48.0)                                    | 21 (41.2)                                  | 45 (44.6)     |
|                                                   | <i>Male</i>                     | 26 (52.0)                                    | 30 (58.8)                                  | 56 (55.5)     |
| <b>ASA score</b>                                  |                                 |                                              |                                            |               |
|                                                   | <i>I (healthy)</i>              | 14 (28.0)                                    | 15 (29.4)                                  | 29 (28.7)     |
|                                                   | <i>II (mild)</i>                | 21 (42.0)                                    | 28 (54.9)                                  | 49 (48.5)     |
|                                                   | <i>III-IV (severe or worse)</i> | 15 (30.0)                                    | 8 (15.7)                                   | 23 (22.8)     |
| <b>Pre-operative treatment</b>                    |                                 |                                              |                                            |               |
|                                                   | <i>None</i>                     | 41 (82.0)                                    | 35 (68.6)                                  | 76 (75.3)     |
|                                                   | <i>Radiotherapy</i>             | 9 (18.0)                                     | 16 (31.4)                                  | 25 (24.7)     |
| <u>Tumor characteristics</u>                      |                                 |                                              |                                            |               |
| <b>Localization</b>                               |                                 |                                              |                                            |               |
|                                                   | Colon right                     | 18 (36.0)                                    | 13 (25.5)                                  | 31 (30.7)     |
|                                                   | Colon left                      | 11 (22.0)                                    | 17 (33.3)                                  | 28 (27.7)     |
|                                                   | Rectum                          | 21 (42.0)                                    | 21 (41.2)                                  | 42 (41.6)     |
| <b>Mucinous cancer</b>                            |                                 |                                              |                                            |               |
|                                                   | no                              | 45 (90.0)                                    | 45 (88.2)                                  | 90 (89.1)     |
|                                                   | yes                             | 5 (10.0)                                     | 6 (11.8)                                   | 11 (10.9)     |
| <b>TNM stage</b>                                  |                                 |                                              |                                            |               |
|                                                   | III                             | 23 (46.0)                                    | 46 (90.2)                                  | 69 (68.3)     |
|                                                   | IV                              | 27 (54.0)                                    | 5 (9.8)                                    | 32 (31.7)     |
| <b>Grade of differentiation</b>                   |                                 |                                              |                                            |               |
|                                                   | low                             | 22 (44.0)                                    | 7 (13.7)                                   | 29 (28.7)     |
|                                                   | medium                          | 24 (48.0)                                    | 38 (74.5)                                  | 62 (61.4)     |
|                                                   | high                            | 4 (8.0)                                      | 6 (11.8)                                   | 10 (9.9)      |
| <u>Surgical characteristics</u>                   |                                 |                                              |                                            |               |
| <b>Period of surgery</b>                          |                                 |                                              |                                            |               |
|                                                   | 1997-2005                       | 19 (38.0)                                    | 13 (25.5)                                  | 32 (31.7)     |
|                                                   | 2006-2010                       | 18 (36.0)                                    | 23 (45.1)                                  | 41 (40.6)     |
|                                                   | 2011-2017                       | 13 (26.0)                                    | 15 (29.4)                                  | 28 (27.7)     |
| <b>Radical operation</b>                          |                                 |                                              |                                            |               |
|                                                   | <i>no</i>                       | 14 (28.0)                                    | 1 (2.0)                                    | 15 (14.9)     |
|                                                   | <i>yes</i>                      | 36 (72.0)                                    | 50 (98.0)                                  | 86 (85.2)     |
| <b>Microscopic radical operation</b>              |                                 |                                              |                                            |               |
|                                                   | <i>no</i>                       | 13 (26.9)                                    | 1 (2.0)                                    | 14 (13.9)     |
|                                                   | <i>yes</i>                      | 37 (74.0)                                    | 50 (98.0)                                  | 87 (86.1)     |

**Table S2. Per-Subject Predictors of the Microbiome in CTF ordination space**

| <b>Predictor</b>         | <b>Variation explained (%)</b> | <b>Crude p-value<br/>(999 permutations)</b> |
|--------------------------|--------------------------------|---------------------------------------------|
| Age, years               | 0.020                          | 0.776                                       |
| Sex                      | 0.011                          | 0.364                                       |
| ASA score                | 0.034                          | 0.140                                       |
| Localization             | 0.011                          | 0.778                                       |
| TNM Stage                | 0.004                          | 0.764                                       |
| Grade of differentiation | 0.007                          | 0.931                                       |
| Period of Surgery        | 0.151                          | 0.001                                       |
| Survival                 | 0.020                          | 0.113                                       |

**Table S3. ASVs separating tumor and normal tissue based on differential ranking**

|                          | ASV ID | Prevalence   |            | Taxonomy |                                                                                                             |
|--------------------------|--------|--------------|------------|----------|-------------------------------------------------------------------------------------------------------------|
|                          |        | ASV          | Cumulative |          |                                                                                                             |
| Normal tissue associated | 1      | Clos-b4ed8ec | 27.7%      | 27.7%    | p. Firmicutes; c. Clostridia; o. Clostridiales; f. Clostridiaceae 1; g. Clostridium sensu stricto 1         |
|                          | 2      | Lach-e23e6e7 | 21.8%      | 39.6%    | p. Firmicutes; c. Clostridia; o. Clostridiales; f. Lachnospiraceae; g. uncl f. Lachnospiraceae              |
|                          | 3      | Bact-7ce20dc | 19.8%      | 50.0%    | p. Bacteroidetes; c. Bacteroidia; o. Bacteroidales; f. Bacteroidaceae; g. Bacteroides                       |
|                          | 4      | Marv-c55b486 | 36.1%      | 68.8%    | p. Firmicutes; c. Clostridia; o. Clostridiales; f. Lachnospiraceae; g. Marvinbryantia                       |
|                          | 5      | Bact-47d7490 | 18.8%      | 73.3%    | p. Bacteroidetes; c. Bacteroidia; o. Bacteroidales; f. Bacteroidaceae; g. Bacteroides                       |
|                          | 6      | Pept-1d2b00f | 19.8%      | 74.8%    | p. Firmicutes; c. Clostridia; o. Clostridiales; f. Peptostreptococcaceae; g. Peptostreptococcus             |
|                          | 7      | Para-3d48874 | 21.3%      | 79.7%    | p. Bacteroidetes; c. Bacteroidia; o. Bacteroidales; f. Prevotellaceae; g. Paraprevotella                    |
|                          | 8      | Rumi-0f06bc7 | 24.8%      | 82.2%    | p. Firmicutes; c. Clostridia; o. Clostridiales; f. Ruminococcaceae; g. Ruminococcaceae UCG-002              |
|                          | 9      | Lach-11902be | 38.1%      | 89.6%    | p. Firmicutes; c. Clostridia; o. Clostridiales; f. Lachnospiraceae; g. uncl f. Lachnospiraceae              |
|                          | 10     | Rumi-3efbc4a | 29.2%      | 90.6%    | p. Firmicutes; c. Clostridia; o. Clostridiales; f. Ruminococcaceae; g. uncl f. Ruminococcaceae              |
|                          | 11     | Alis-520887a | 30.7%      | 92.1%    | p. Bacteroidetes; c. Bacteroidia; o. Bacteroidales; f. Rikenellaceae; g. Alistipes                          |
|                          | 12     | Bact-87e7824 | 15.3%      | 93.1%    | p. Bacteroidetes; c. Bacteroidia; o. Bacteroidales; f. Bacteroidaceae; g. Bacteroides                       |
|                          | 13     | Buty-da8b26f | 43.6%      | 96.0%    | p. Firmicutes; c. Clostridia; o. Clostridiales; f. Ruminococcaceae; g. Butyricoccus                         |
|                          | 14     | Anae-4f9106b | 30.7%      | 97.0%    | p. Firmicutes; c. Clostridia; o. Clostridiales; f. Ruminococcaceae; g. Anaerotruncus                        |
|                          | 15     | Rumi-494e655 | 33.7%      | 97.0%    | p. Firmicutes; c. Clostridia; o. Clostridiales; f. Ruminococcaceae; g. Ruminococcaceae UCG-002              |
|                          | 16     | Anae-2ee585c | 26.2%      | 97.5%    | p. Firmicutes; c. Clostridia; o. Clostridiales; f. Lachnospiraceae; g. Anaerostipes                         |
|                          | 17     | Blau-400ef32 | 64.4%      | 98.0%    | p. Firmicutes; c. Clostridia; o. Clostridiales; f. Lachnospiraceae; g. Blautia                              |
|                          | 18     | Bifi-38b7580 | 41.6%      | 98.0%    | p. Actinobacteria; c. Actinobacteria; o. Bifidobacteriales; f. Bifidobacteriaceae; g. Bifidobacterium       |
|                          | 19     | Rumi-a39d801 | 19.3%      | 99.0%    | p. Firmicutes; c. Clostridia; o. Clostridiales; f. Ruminococcaceae; g. Ruminococcus 2                       |
|                          | 20     | Rumi-75a7dd0 | 24.8%      | 99.0%    | p. Firmicutes; c. Clostridia; o. Clostridiales; f. Ruminococcaceae; g. Ruminococcus 2                       |
|                          | 21     | Rumi-f7d40e3 | 20.3%      | 99.5%    | p. Firmicutes; c. Clostridia; o. Clostridiales; f. Ruminococcaceae; g. Ruminococcus 2                       |
|                          | 22     | Blau-8f6e2a9 | 95.0%      | 100.0%   | p. Firmicutes; c. Clostridia; o. Clostridiales; f. Lachnospiraceae; g. Blautia                              |
| Tumor Tissue Associated  | 1      | Fuso-e47b7c5 | 25.2%      | 25.2%    | p. Fusobacteria; c. Fusobacteriia; o. Fusobacteriales; f. Fusobacteriaceae; g. Fusobacterium                |
|                          | 2      | Camp-5b14d87 | 27.2%      | 46.5%    | p. Proteobacteria; c. Epsilonproteobacteria; o. Campylobacteriales; f. Campylobacteraceae; g. Campylobacter |
|                          | 3      | Fuso-d2f4ba7 | 12.4%      | 50.0%    | p. Fusobacteria; c. Fusobacteriia; o. Fusobacteriales; f. Fusobacteriaceae; g. Fusobacterium                |
|                          | 4      | Hung-78c2b8e | 33.7%      | 61.9%    | p. Firmicutes; c. Clostridia; o. Clostridiales; f. Lachnospiraceae; g. Hungatella                           |
|                          | 5      | Fuso-7fa9543 | 21.3%      | 66.8%    | p. Fusobacteria; c. Fusobacteriia; o. Fusobacteriales; f. Fusobacteriaceae; g. Fusobacterium                |
|                          | 6      | Gran-a5b69f1 | 42.6%      | 79.7%    | p. Firmicutes; c. Bacilli; o. Lactobacillales; f. Carnobacteriaceae; g. Granulicatella                      |
|                          | 7      | Bact-26547c9 | 34.2%      | 87.6%    | p. Bacteroidetes; c. Bacteroidia; o. Bacteroidales; f. Bacteroidaceae; g. Bacteroides                       |
|                          | 8      | Stre-d3829c5 | 19.3%      | 88.1%    | p. Firmicutes; c. Bacilli; o. Lactobacillales; f. Streptococcaceae; g. Streptococcus                        |
|                          | 9      | Mass-bfb5b51 | 38.1%      | 91.6%    | p. Proteobacteria; c. Betaproteobacteria; o. Burkholderiales; f. Oxalobacteraceae; g. Massilia              |
|                          | 10     | Para-8d83490 | 11.9%      | 92.6%    | p. Bacteroidetes; c. Bacteroidia; o. Bacteroidales; f. Porphyromonadaceae; g. Parabacteroides               |
|                          | 11     | Porp-69023d0 | 18.8%      | 92.6%    | p. Bacteroidetes; c. Bacteroidia; o. Bacteroidales; f. Porphyromonadaceae; g. Porphyromonas                 |
|                          | 12     | Lach-7cd4efa | 54.0%      | 95.5%    | p. Firmicutes; c. Clostridia; o. Clostridiales; f. Lachnospiraceae; g. Lachnoclostridium                    |
|                          | 13     | Hung-82c448c | 29.7%      | 96.0%    | p. Firmicutes; c. Clostridia; o. Clostridiales; f. Lachnospiraceae; g. Hungatella                           |
|                          | 14     | Para-98a6938 | 17.3%      | 97.5%    | p. Proteobacteria; c. Betaproteobacteria; o. Burkholderiales; f. Alcaligenaceae; g. Parasutterella          |
|                          | 15     | Stre-101637a | 36.6%      | 98.5%    | p. Firmicutes; c. Bacilli; o. Lactobacillales; f. Streptococcaceae; g. Streptococcus                        |
|                          | 16     | Sutt-1d5d65b | 19.3%      | 99.5%    | p. Proteobacteria; c. Betaproteobacteria; o. Burkholderiales; f. Alcaligenaceae; g. Sutterella              |
|                          | 17     | Rumi-eee1408 | 20.3%      | 100.0%   | p. Firmicutes; c. Clostridia; o. Clostridiales; f. Ruminococcaceae; g. Ruminococcaceae UCG-014              |

**Table S4. Effect of tissue type on beta diversity in an unpaired analysis**

| <b>Metric</b>               | Our Data               |                                  | Flemer <i>et al</i> (replication) |                                  |
|-----------------------------|------------------------|----------------------------------|-----------------------------------|----------------------------------|
|                             | Variance Explained (%) | Crude p-value (999 permutations) | Variance Explained (%)            | Crude p-value (999 permutations) |
| Bray Curtis dissimilarity   | 0.34                   | 0.993                            | 0.57                              | 0.999                            |
| Jaccard distance            | 0.24                   | 1.000                            | 0.79                              | 1.000                            |
| Unweighted UniFrac distance | 0.39                   | 0.887                            | --                                | --                               |
| Weighted UniFrac distance   | 0.67                   | 0.164                            | --                                | --                               |

**Table S5. Difference between normal and tumor tissue and survival**

| <b>Metric</b>                 | <b>Crude</b>      | <b>Fully adjusted<sup>1</sup></b> |
|-------------------------------|-------------------|-----------------------------------|
| Binary Jaccard (0.1 unit)     | 1.53 (1.00, 2.34) | 1.61 (0.83, 3.15)                 |
| Aitchison (10 units)          | 1.91 (1.12, 3.27) | 1.42 (0.59, 3.44)                 |
| CTF (1 unit)                  | 1.20 (0.54, 2.67) | 1.94 (0.54, 6.98)                 |
| Bray Curtis (0.1 unit)        | 1.63 (1.18, 2.26) | 1.70 (1.06, 2.73)                 |
| unweighted UniFrac (0.1 unit) | 1.91 (1.06, 3.43) | 2.01 (0.80, 5.02)                 |
| weighted UniFrac (0.1 unit)   | 1.36 (1.11, 1.66) | 1.48 (1.08, 2.03)                 |

<sup>1</sup>Adjusted for age, sex, ASA score, tumor localization, TNM stage, differentiation grade, surgery period, and radical surgery

**Table S6. Feature Ranks for tumor vs normal tissue, based on long survival**

|                          | Feature-id      | Prevalence |            | Taxonomy                                                                                                   |
|--------------------------|-----------------|------------|------------|------------------------------------------------------------------------------------------------------------|
|                          |                 | ASV        | Cumulative |                                                                                                            |
| Normal tissue associated | 1 Bact-47d7490  | 18.8%      | 18.8%      | p. Bacteroidetes; c. Bacteroidia; o. Bacteroidales; f. Bacteroidaceae; g. Bacteroides                      |
|                          | 2 Pept-1d2b00f  | 19.8%      | 34.2%      | p. Firmicutes; c. Clostridia; o. Clostridiales; f. Peptostreptococcaceae; g. Peptostreptococcus            |
|                          | 3 Bact-208134d  | 17.8%      | 45.5%      | p. Bacteroidetes; c. Bacteroidia; o. Bacteroidales; f. Bacteroidaceae; g. Bacteroides                      |
|                          | 4 Para-3d48874  | 21.3%      | 52.5%      | p. Bacteroidetes; c. Bacteroidia; o. Bacteroidales; f. Prevotellaceae; g. Paraprevotella                   |
|                          | 5 Bact-5859c64  | 25.2%      | 64.4%      | p. Bacteroidetes; c. Bacteroidia; o. Bacteroidales; f. Bacteroidaceae; g. Bacteroides                      |
|                          | 6 Barn-f674778  | 19.3%      | 70.8%      | p. Bacteroidetes; c. Bacteroidia; o. Bacteroidales; f. Porphyromonadaceae; g. Barnesiella                  |
|                          | 7 Marv-c55b486  | 36.1%      | 80.2%      | p. Firmicutes; c. Clostridia; o. Clostridiales; f. Lachnospiraceae; g. Marvinbryantia                      |
|                          | 8 Clos-b4ed8ec  | 27.7%      | 84.2%      | p. Firmicutes; c. Clostridia; o. Clostridiales; f. Clostridiaceae 1; g. Clostridium sensu stricto 1        |
|                          | 9 Para-218f40f  | 35.6%      | 89.6%      | p. Bacteroidetes; c. Bacteroidia; o. Bacteroidales; f. Porphyromonadaceae; g. Parabacteroides              |
|                          | 10 Bifi-38b7580 | 41.6%      | 92.1%      | p. Actinobacteria; c. Actinobacteria; o. Bifidobacteriales; f. Bifidobacteriaceae; g. Bifidobacterium      |
|                          | 11 Desu-fa6956a | 23.3%      | 93.1%      | p. Proteobacteria; c. Deltaproteobacteria; o. Desulfovibrionales; f. Desulfovibrionaceae; g. Desulfovibrio |
|                          | 12 Meth-26639d9 | 24.8%      | 93.1%      | p. Euryarchaeota; c. Methanobacteria; o. Methanobacteriales; f. Methanobacteriaceae; g. Methanobrevibacter |
|                          | 13 Lach-e23e6e7 | 21.8%      | 93.1%      | p. Firmicutes; c. Clostridia; o. Clostridiales; f. Lachnospiraceae; g. unsp. f. Lachnospiraceae            |
|                          | 14 Bact-b74ab69 | 19.3%      | 94.1%      | p. Bacteroidetes; c. Bacteroidia; o. Bacteroidales; f. Bacteroidaceae; g. Bacteroides                      |
|                          | 15 Stre-a4cd615 | 16.8%      | 95.5%      | p. Firmicutes; c. Bacilli; o. Lactobacillales; f. Streptococcaceae; g. Streptococcus                       |
|                          | 16 Sutt-381ef54 | 19.8%      | 96.0%      | p. Proteobacteria; c. Betaproteobacteria; o. Burkholderiales; f. Alcaligenaceae; g. Sutterella             |
|                          | 17 Bact-7ce20dc | 19.8%      | 96.0%      | p. Bacteroidetes; c. Bacteroidia; o. Bacteroidales; f. Bacteroidaceae; g. Bacteroides                      |
|                          | 18 Buty-da8b26f | 43.6%      | 97.0%      | p. Firmicutes; c. Clostridia; o. Clostridiales; f. Ruminococcaceae; g. Butyricoccus                        |
|                          | 19 Rumi-4a1547a | 46.5%      | 97.0%      | p. Firmicutes; c. Clostridia; o. Clostridiales; f. Ruminococcaceae; g. Ruminiclostridium 6                 |
|                          | 20 Rumi-8dc9986 | 21.8%      | 98.0%      | p. Firmicutes; c. Clostridia; o. Clostridiales; f. Ruminococcaceae; g. Ruminococcaceae UCG-002             |
|                          | 21 Bifi-f633cf9 | 24.8%      | 98.0%      | p. Actinobacteria; c. Actinobacteria; o. Bifidobacteriales; f. Bifidobacteriaceae; g. Bifidobacterium      |
|                          | 22 Turi-c96cf26 | 25.2%      | 98.0%      | p. Firmicutes; c. Erysipelotrichia; o. Erysipelotrichales; f. Erysipelotrichaceae; g. Turicibacter         |
|                          | 23 Mass-cabd729 | 24.8%      | 99.0%      | p. Proteobacteria; c. Betaproteobacteria; o. Burkholderiales; f. Oxalobacteraceae; g. Massilia             |
|                          | 24 Rumi-75a7dd0 | 24.8%      | 99.0%      | p. Firmicutes; c. Clostridia; o. Clostridiales; f. Ruminococcaceae; g. Ruminococcus 2                      |
|                          | 25 Hold-5637d39 | 14.4%      | 99.0%      | p. Firmicutes; c. Erysipelotrichia; o. Erysipelotrichales; f. Erysipelotrichaceae; g. Holdemanella         |
|                          | 26 Haem-18eb929 | 41.1%      | 99.5%      | p. Proteobacteria; c. Gammaproteobacteria; o. Pasteurellales; f. Pasteurellaceae; g. Haemophilus           |
|                          | 27 Chri-b03de84 | 43.1%      | 100.0%     | p. Firmicutes; c. Clostridia; o. Clostridiales; f. Christensenellaceae; g. Christensenellaceae R-7 group   |

|              | Feature-id | Prevalence   |            | Taxonomy |                                                                                                                 |
|--------------|------------|--------------|------------|----------|-----------------------------------------------------------------------------------------------------------------|
|              |            | ASV          | Cumulative |          |                                                                                                                 |
| Tumor tissue | 1          | Hung-78c2b8e | 33.7%      | 33.7%    | p. Firmicutes; c. Clostridia; o. Clostridiales; f. Lachnospiraceae; g. Hungatella                               |
|              | 2          | Fuso-e47b7c5 | 25.2%      | 47.0%    | p. Fusobacteria; c. Fusobacteriia; o. Fusobacteriales; f. Fusobacteriaceae; g. Fusobacterium                    |
|              | 3          | Lach-7cd4efa | 54.0%      | 66.8%    | p. Firmicutes; c. Clostridia; o. Clostridiales; f. Lachnospiraceae; g. Lachnoclostridium                        |
|              | 4          | Camp-5b14d87 | 27.2%      | 77.7%    | p. Proteobacteria; c. Epsilonproteobacteria; o. Campylobacterales; f. Campylobacteraceae; g. Campylobacter      |
|              | 5          | Rose-3a89328 | 37.1%      | 86.1%    | p. Firmicutes; c. Clostridia; o. Clostridiales; f. Lachnospiraceae; g. Roseburia                                |
|              | 6          | Sutt-1d5d65b | 19.3%      | 88.6%    | p. Proteobacteria; c. Betaproteobacteria; o. Burkholderiales; f. Alcaligenaceae; g. Sutterella                  |
|              | 7          | Stre-d3829c5 | 19.3%      | 91.1%    | p. Firmicutes; c. Bacilli; o. Lactobacillales; f. Streptococcaceae; g. Streptococcus                            |
|              | 8          | Buty-62c3369 | 25.2%      | 92.1%    | p. Firmicutes; c. Clostridia; o. Clostridiales; f. Ruminococcaceae; g. Butyricoccus                             |
|              | 9          | Hung-82c448c | 29.7%      | 93.6%    | p. Firmicutes; c. Clostridia; o. Clostridiales; f. Lachnospiraceae; g. Hungatella                               |
|              | 10         | Fuso-d2f4ba7 | 12.4%      | 93.6%    | p. Fusobacteria; c. Fusobacteriia; o. Fusobacteriales; f. Fusobacteriaceae; g. Fusobacterium                    |
|              | 11         | Mass-bfb5b51 | 38.1%      | 95.5%    | p. Proteobacteria; c. Betaproteobacteria; o. Burkholderiales; f. Oxalobacteraceae; g. Massilia                  |
|              | 12         | Bact-866ea1c | 13.9%      | 95.5%    | p. Bacteroidetes; c. Bacteroidia; o. Bacteroidales; f. Bacteroidaceae; g. Bacteroides                           |
|              | 13         | Porp-0799969 | 21.3%      | 95.5%    | p. Bacteroidetes; c. Bacteroidia; o. Bacteroidales; f. Porphyromonadaceae; g. Porphyromonas                     |
|              | 14         | Dial-08dda4f | 13.4%      | 96.0%    | p. Firmicutes; c. Negativicutes; o. Selenomonadales; f. Veillonellaceae; g. Dialister                           |
|              | 15         | Barn-53f976e | 14.9%      | 97.5%    | p. Bacteroidetes; c. Bacteroidia; o. Bacteroidales; f. Porphyromonadaceae; g. Barnesiella                       |
|              | 16         | Bact-0246885 | 20.8%      | 97.5%    | p. Bacteroidetes; c. Bacteroidia; o. Bacteroidales; f. Bacteroidaceae; g. Bacteroides                           |
|              | 17         | Phas-fb7a1c0 | 20.8%      | 97.5%    | p. Firmicutes; c. Negativicutes; o. Selenomonadales; f. Acidaminococcaceae; g. Phascolarctobacterium            |
|              | 18         | Rumi-6a57339 | 31.2%      | 98.0%    | p. Firmicutes; c. Clostridia; o. Clostridiales; f. Ruminococcaceae; g. unsp. f. Ruminococcaceae                 |
|              | 19         | Esch-ffc36e2 | 90.6%      | 100.0%   | p. Proteobacteria; c. Gammaproteobacteria; o. Enterobacteriales; f. Enterobacteriaceae; g. Escherichia/Shigella |



**Table S7. Feature Ranks for interaction term (short survival in tumor tissue)**

|               | Feature-id      | Prevalence |            | Taxonomy                                                                                                            |
|---------------|-----------------|------------|------------|---------------------------------------------------------------------------------------------------------------------|
|               |                 | ASV        | Cumulative |                                                                                                                     |
| Normal Tissue | 1 Chri-fb2e43a  | 20.3%      | 20.3%      | p. Firmicutes; c. Clostridia; o. Clostridiales; f. Christensenellaceae; g. Christensenellaceae R-7 group            |
|               | 2 Anae-2ee585c  | 26.2%      | 40.6%      | p. Firmicutes; c. Clostridia; o. Clostridiales; f. Lachnospiraceae; g. Anaerostipes                                 |
|               | 3 Alis-0ce6000  | 14.9%      | 50.5%      | p. Bacteroidetes; c. Bacteroidia; o. Bacteroidales; f. Rikenellaceae; g. Alistipes                                  |
|               | 4 Barn-53f976e  | 14.9%      | 55.9%      | p. Bacteroidetes; c. Bacteroidia; o. Bacteroidales; f. Porphyromonadaceae; g. Barnesiella                           |
|               | 5 Chri-f7035cb  | 20.8%      | 63.9%      | p. Firmicutes; c. Clostridia; o. Clostridiales; f. Christensenellaceae; g. Christensenellaceae R-7 group            |
|               | 6 Romb-df3d611  | 55.0%      | 78.7%      | p. Firmicutes; c. Clostridia; o. Clostridiales; f. Peptostreptococcaceae; g. Romboutsia                             |
|               | 7 Rumi-6c7b500  | 19.3%      | 80.7%      | p. Firmicutes; c. Clostridia; o. Clostridiales; f. Ruminococcaceae; g. Ruminococcaceae NK4A214 group                |
|               | 8 Rhod-1667bf7  | 24.3%      | 83.2%      | p. Proteobacteria; c. Alphaproteobacteria; o. Rhodospirillales; f. Rhodospirillaceae; g. unsp. f. Rhodospirillaceae |
|               | 9 Lach-7079408  | 50.5%      | 88.1%      | p. Firmicutes; c. Clostridia; o. Clostridiales; f. Lachnospiraceae; g. Lachnospiraceae NK4A136 group                |
|               | 10 Rumi-6a57339 | 31.2%      | 91.6%      | p. Firmicutes; c. Clostridia; o. Clostridiales; f. Ruminococcaceae; g. unsp. f. Ruminococcaceae                     |
|               | 11 Alis-520887a | 30.7%      | 93.6%      | p. Bacteroidetes; c. Bacteroidia; o. Bacteroidales; f. Rikenellaceae; g. Alistipes                                  |
|               | 12 Sene-781430c | 24.8%      | 93.6%      | p. Actinobacteria; c. Coriobacteriia; o. Coriobacteriales; f. Coriobacteriaceae; g. Senegalimassilia                |
|               | 13 Rumi-3efbc4a | 29.2%      | 93.6%      | p. Firmicutes; c. Clostridia; o. Clostridiales; f. Ruminococcaceae; g. unsp. f. Ruminococcaceae                     |
|               | 14 Buty-62c3369 | 25.2%      | 95.0%      | p. Firmicutes; c. Clostridia; o. Clostridiales; f. Ruminococcaceae; g. Butyricoccus                                 |
|               | 15 Lach-7cd4efa | 54.0%      | 97.0%      | p. Firmicutes; c. Clostridia; o. Clostridiales; f. Lachnospiraceae; g. Lachnoclostridium                            |
|               | 16 Rose-3a89328 | 37.1%      | 99.0%      | p. Firmicutes; c. Clostridia; o. Clostridiales; f. Lachnospiraceae; g. Roseburia                                    |
|               | 17 Rose-d3864fc | 34.2%      | 99.0%      | p. Firmicutes; c. Clostridia; o. Clostridiales; f. Lachnospiraceae; g. Roseburia                                    |
|               | 18 Lach-3a2e845 | 33.7%      | 99.5%      | p. Firmicutes; c. Clostridia; o. Clostridiales; f. Lachnospiraceae; g. unsp. f. Lachnospiraceae                     |
|               | 19 Hung-78c2b8e | 33.7%      | 100.0%     | p. Firmicutes; c. Clostridia; o. Clostridiales; f. Lachnospiraceae; g. Hungatella                                   |

|              | Feature-id      | Prevalence |            | Taxonomy                                                                                                                       |
|--------------|-----------------|------------|------------|--------------------------------------------------------------------------------------------------------------------------------|
|              |                 | ASV        | Cumulative |                                                                                                                                |
| Tumor Tissue | 1 Pept-1d2b00f  | 19.8%      | 19.8%      | p. Firmicutes; c. Clostridia; o. Clostridiales; f. Peptostreptococcaceae; g. Peptostreptococcus                                |
|              | 2 Bact-47d7490  | 18.8%      | 34.2%      | p. Bacteroidetes; c. Bacteroidia; o. Bacteroidales; f. Bacteroidaceae; g. Bacteroides                                          |
|              | 3 Bifi-c299192  | 14.4%      | 45.0%      | p. Actinobacteria; c. Actinobacteria; o. Bifidobacteriales; f. Bifidobacteriaceae; g. Bifidobacterium                          |
|              | 4 Bact-208134d  | 17.8%      | 55.9%      | p. Bacteroidetes; c. Bacteroidia; o. Bacteroidales; f. Bacteroidaceae; g. Bacteroides                                          |
|              | 5 Sutt-381ef54  | 19.8%      | 67.3%      | p. Proteobacteria; c. Betaproteobacteria; o. Burkholderiales; f. Alcaligenaceae; g. Sutterella                                 |
|              | 6 Para-3d48874  | 21.3%      | 71.3%      | p. Bacteroidetes; c. Bacteroidia; o. Bacteroidales; f. Prevotellaceae; g. Paraprevotella                                       |
|              | 7 Bact-5859c64  | 25.2%      | 77.2%      | p. Bacteroidetes; c. Bacteroidia; o. Bacteroidales; f. Bacteroidaceae; g. Bacteroides                                          |
|              | 8 Veil-24522f7  | 27.7%      | 81.7%      | p. Firmicutes; c. Negativicutes; o. Selenomonadales; f. Veillonellaceae; g. Veillonella                                        |
|              | 9 Barn-f674778  | 19.3%      | 85.1%      | p. Bacteroidetes; c. Bacteroidia; o. Bacteroidales; f. Porphyromonadaceae; g. Barnesiella                                      |
|              | 10 Bact-26547c9 | 34.2%      | 92.1%      | p. Bacteroidetes; c. Bacteroidia; o. Bacteroidales; f. Bacteroidaceae; g. Bacteroides                                          |
|              | 11 Chri-b03de84 | 43.1%      | 95.0%      | p. Firmicutes; c. Clostridia; o. Clostridiales; f. Christensenellaceae; g. Christensenellaceae R-7 group                       |
|              | 12 Bact-98fcc7e | 53.5%      | 96.0%      | p. Bacteroidetes; c. Bacteroidia; o. Bacteroidales; f. Bacteroidaceae; g. Bacteroides                                          |
|              | 13 Fuso-7fa9543 | 21.3%      | 96.0%      | p. Fusobacteria; c. Fusobacteriia; o. Fusobacteriales; f. Fusobacteriaceae; g. Fusobacterium                                   |
|              | 14 Sutt-222e21f | 25.2%      | 97.0%      | p. Proteobacteria; c. Betaproteobacteria; o. Burkholderiales; f. Alcaligenaceae; g. Sutterella                                 |
|              | 15 Para-218f40f | 35.6%      | 97.5%      | p. Bacteroidetes; c. Bacteroidia; o. Bacteroidales; f. Porphyromonadaceae; g. Parabacteroides                                  |
|              | 16 Bifi-f633cf9 | 24.8%      | 97.5%      | p. Actinobacteria; c. Actinobacteria; o. Bifidobacteriales; f. Bifidobacteriaceae; g. Bifidobacterium                          |
|              | 17 Clos-875f9ef | 27.2%      | 99.0%      | p. Firmicutes; c. Clostridia; o. Clostridiales; f. Clostridiaceae 1; g. Clostridium sensu stricto 1                            |
|              | 18 Rose-d91b5c7 | 34.2%      | 99.5%      | p. Firmicutes; c. Clostridia; o. Clostridiales; f. Lachnospiraceae; g. Roseburia                                               |
|              | 19 Fret-2b8622a | 22.3%      | 99.5%      | p. Synergistetes; c. Synergistia; o. Synergistales; f. Synergistaceae; g. Fretibacterium                                       |
|              | 20 Fuso-62b2f8b | 19.3%      | 99.5%      | p. Fusobacteria; c. Fusobacteriia; o. Fusobacteriales; f. Fusobacteriaceae; g. Fusobacterium                                   |
|              | 21 Sutt-dfc8256 | 33.7%      | 99.5%      | p. Proteobacteria; c. Betaproteobacteria; o. Burkholderiales; f. Alcaligenaceae; g. Sutterella                                 |
|              | 22 Marv-c55b486 | 36.1%      | 99.5%      | p. Firmicutes; c. Clostridia; o. Clostridiales; f. Lachnospiraceae; g. Marvinbryantia                                          |
|              | 23 Rumi-4a1547a | 46.5%      | 99.5%      | p. Firmicutes; c. Clostridia; o. Clostridiales; f. Ruminococcaceae; g. Ruminiclostridium 6                                     |
|              | 24 Bact-b74ab69 | 19.3%      | 99.5%      | p. Bacteroidetes; c. Bacteroidia; o. Bacteroidales; f. Bacteroidaceae; g. Bacteroides                                          |
|              | 25 Gast-90e9bc6 | 24.8%      | 99.5%      | p. Cyanobacteria; c. Melainabacteria; o. Gastranaerophilales; f. unsp. o. Gastranaerophilales; g. unsp. o. Gastranaerophilales |
|              | 26 Meth-26639d9 | 24.8%      | 99.5%      | p. Euryarchaeota; c. Methanobacteria; o. Methanobacteriales; f. Methanobacteriaceae; g. Methanobrevibacter                     |
|              | 27 Dial-35fd415 | 60.4%      | 99.5%      | p. Firmicutes; c. Negativicutes; o. Selenomonadales; f. Veillonellaceae; g. Dialister                                          |

|    |              |       |        |                                                                                                            |
|----|--------------|-------|--------|------------------------------------------------------------------------------------------------------------|
|    | Lach-        |       |        |                                                                                                            |
| 28 | 3765e25      | 30.2% | 99.5%  | p. Firmicutes; c. Clostridia; o. Clostridiales; f. Lachnospiraceae; g. Lachnospiraceae NK4A136 group       |
| 29 | Desu-fa6956a | 23.3% | 99.5%  | p. Proteobacteria; c. Deltaproteobacteria; o. Desulfovibrionales; f. Desulfovibrionaceae; g. Desulfovibrio |
| 30 | Rumi-8e121f6 | 38.1% | 100.0% | p. Firmicutes; c. Clostridia; o. Clostridiales; f. Ruminococcaceae; g. unsp. f. Ruminococcaceae            |

---

**Table S8. Tumor rPCA PC 1 features-associated ASVS for the ALR calculation**

|                     | Feature-id   | Taxonomy                                                                                                    |
|---------------------|--------------|-------------------------------------------------------------------------------------------------------------|
| Long-term Survival  | Bact-70d55ba | p. Bacteroidetes; c. Bacteroidia; o. Bacteroidales; f. Bacteroidaceae; g. Bacteroides                       |
|                     | Bact-b6635d6 | p. Bacteroidetes; c. Bacteroidia; o. Bacteroidales; f. Bacteroidaceae; g. Bacteroides                       |
|                     | Faec-4516aa6 | p. Firmicutes; c. Clostridia; o. Clostridiales; f. Ruminococcaceae; g. Faecalibacterium                     |
|                     | Faec-c728ad6 | p. Firmicutes; c. Clostridia; o. Clostridiales; f. Ruminococcaceae; g. Faecalibacterium                     |
|                     | Faec-22f4ee9 | p. Firmicutes; c. Clostridia; o. Clostridiales; f. Ruminococcaceae; g. Faecalibacterium                     |
|                     | Subd-c6fdf63 | p. Firmicutes; c. Clostridia; o. Clostridiales; f. Ruminococcaceae; g. Subdoligranulum                      |
|                     | Rose-b264ac8 | p. Firmicutes; c. Clostridia; o. Clostridiales; f. Lachnospiraceae; g. Roseburia                            |
|                     | Subd-b6a1cfc | p. Firmicutes; c. Clostridia; o. Clostridiales; f. Ruminococcaceae; g. Subdoligranulum                      |
|                     | Fusi-9df2517 | p. Firmicutes; c. Clostridia; o. Clostridiales; f. Lachnospiraceae; g. Fusicatenibacter                     |
|                     | Bifi-3f3a0ea | p. Actinobacteria; c. Actinobacteria; o. Bifidobacteriales; f. Bifidobacteriaceae; g. Bifidobacterium       |
| Short-term Survival | Pept-f148c98 | p. Firmicutes; c. Clostridia; o. Clostridiales; f. Peptostreptococcaceae; g. Peptostreptococcus             |
|                     | Bact-47f3d64 | p. Bacteroidetes; c. Bacteroidia; o. Bacteroidales; f. Bacteroidaceae; g. Bacteroides                       |
|                     | Dial-63719d6 | p. Firmicutes; c. Negativicutes; o. Selenomonadales; f. Veillonellaceae; g. Dialister                       |
|                     | Parv-8f3c8cb | p. Firmicutes; c. Clostridia; o. Clostridiales; f. Family XI; g. Parvimonas                                 |
|                     | Fuso-e47b7c5 | p. Fusobacteria; c. Fusobacteriia; o. Fusobacteriales; f. Fusobacteriaceae; g. Fusobacterium                |
|                     | Fret-2b8622a | p. Synergistetes; c. Synergistia; o. Synergistales; f. Synergistaceae; g. Fretibacterium                    |
|                     | Solo-114d0ae | p. Firmicutes; c. Erysipelotrichia; o. Erysipelotrichales; f. Erysipelotrichaceae; g. Solobacterium         |
|                     | Clos-a82bde6 | p. Firmicutes; c. Clostridia; o. Clostridiales; o. Clostridiales; o. Clostridiales                          |
|                     | Camp-5b14d87 | p. Proteobacteria; c. Epsilonproteobacteria; o. Campylobacteriales; f. Campylobacteraceae; g. Campylobacter |
|                     | Bact-26547c9 | p. Bacteroidetes; c. Bacteroidia; o. Bacteroidales; f. Bacteroidaceae; g. Bacteroides                       |
|                     | Gran-a5b69f1 | p. Firmicutes; c. Bacilli; o. Lactobacillales; f. Carnobacteriaceae; g. Granulicatella                      |
|                     | Lach-7273e6e | p. Firmicutes; c. Clostridia; o. Clostridiales; f. Lachnospiraceae; g. Lachnospiraceae FCS020 group         |
|                     | Porp-69023d0 | p. Bacteroidetes; c. Bacteroidia; o. Bacteroidales; f. Porphyromonadaceae; g. Porphyromonas                 |
|                     | Fuso-7fa9543 | p. Fusobacteria; c. Fusobacteriia; o. Fusobacteriales; f. Fusobacteriaceae; g. Fusobacterium                |
|                     | Geme-7bd174e | p. Firmicutes; c. Bacilli; o. Bacillales; f. Family XI; g. Gemella                                          |
|                     | Lach-3682830 | p. Firmicutes; c. Clostridia; o. Clostridiales; f. Lachnospiraceae; g. Lachnospiraceae FCS020 group         |
|                     | Bifi-37020b4 | p. Actinobacteria; c. Actinobacteria; o. Bifidobacteriales; f. Bifidobacteriaceae; g. Bifidobacterium       |
|                     | Fuso-d2f4ba7 | p. Fusobacteria; c. Fusobacteriia; o. Fusobacteriales; f. Fusobacteriaceae; g. Fusobacterium                |
|                     | Bact-605c17c | p. Bacteroidetes; c. Bacteroidia; o. Bacteroidales; f. Bacteroidaceae; g. Bacteroides                       |
|                     | Fret-fd4122f | p. Synergistetes; c. Synergistia; o. Synergistales; f. Synergistaceae; g. Fretibacterium                    |
|                     | Camp-7e4c8c9 | p. Proteobacteria; c. Epsilonproteobacteria; o. Campylobacteriales; f. Campylobacteraceae; g. Campylobacter |
|                     | Porp-1693b47 | p. Bacteroidetes; c. Bacteroidia; o. Bacteroidales; f. Porphyromonadaceae; g. Porphyromonas                 |
|                     | Bifi-d1d2824 | p. Actinobacteria; c. Actinobacteria; o. Bifidobacteriales; f. Bifidobacteriaceae; g. Bifidobacterium       |
|                     | Rumi-aaa27b7 | p. Firmicutes; c. Clostridia; o. Clostridiales; f. Ruminococcaceae; g. Ruminiclostridium 5                  |
|                     | Rumi-af67155 | p. Firmicutes; c. Clostridia; o. Clostridiales; f. Ruminococcaceae; g. Ruminococcaceae UCG-005              |

**Table S9. Tumor rPCA PC 2 associated features used in the ALR calculation**

|                     | ASV ID                                                                                   | Taxonomy                                                                                                        |
|---------------------|------------------------------------------------------------------------------------------|-----------------------------------------------------------------------------------------------------------------|
| Long-term Survival  | Osci-d425791                                                                             | p. Firmicutes; c. Clostridia; o. Clostridiales; f. Ruminococcaceae; g. Oscillibacter                            |
|                     | Bifi-d1d2824                                                                             | p. Actinobacteria; c. Actinobacteria; o. Bifidobacteriales; f. Bifidobacteriaceae; g. Bifidobacterium           |
|                     | Bact-605c17c                                                                             | p. Bacteroidetes; c. Bacteroidia; o. Bacteroidales; f. Bacteroidaceae; g. Bacteroides                           |
|                     | Lach-b61ab87                                                                             | p. Firmicutes; c. Clostridia; o. Clostridiales; f. Lachnospiraceae; f. Lachnospiraceae                          |
|                     | Bifi-37020b4                                                                             | p. Actinobacteria; c. Actinobacteria; o. Bifidobacteriales; f. Bifidobacteriaceae; g. Bifidobacterium           |
|                     | Alis-0bf0743                                                                             | p. Bacteroidetes; c. Bacteroidia; o. Bacteroidales; f. Rikenellaceae; g. Alistipes                              |
|                     | Bact-b24ef5f                                                                             | p. Bacteroidetes; c. Bacteroidia; o. Bacteroidales; f. Bacteroidaceae; g. Bacteroides                           |
|                     | Rose-f6bea81                                                                             | p. Firmicutes; c. Clostridia; o. Clostridiales; f. Lachnospiraceae; g. Roseburia                                |
| Short-term Survival | Bact-47f3d64                                                                             | p. Bacteroidetes; c. Bacteroidia; o. Bacteroidales; f. Bacteroidaceae; g. Bacteroides                           |
|                     | Bact-26547c9                                                                             | p. Bacteroidetes; c. Bacteroidia; o. Bacteroidales; f. Bacteroidaceae; g. Bacteroides                           |
|                     | Bact-4abaa48                                                                             | p. Bacteroidetes; c. Bacteroidia; o. Bacteroidales; f. Bacteroidaceae; g. Bacteroides                           |
|                     | Dial-35fd415                                                                             | p. Firmicutes; c. Negativicutes; o. Selenomonadales; f. Veillonellaceae; g. Dialister                           |
|                     | Esch-ffc36e2                                                                             | p. Proteobacteria; c. Gammaproteobacteria; o. Enterobacteriales; f. Enterobacteriaceae; g. Escherichia/Shigella |
|                     | Dial-63719d6                                                                             | p. Firmicutes; c. Negativicutes; o. Selenomonadales; f. Veillonellaceae; g. Dialister                           |
|                     | Camp-5b14d87                                                                             | p. Proteobacteria; c. Epsilonproteobacteria; o. Campylobacteriales; f. Campylobacteraceae; g. Campylobacter     |
|                     | Bact-b6635d6                                                                             | p. Bacteroidetes; c. Bacteroidia; o. Bacteroidales; f. Bacteroidaceae; g. Bacteroides                           |
|                     | Fuso-fb12967                                                                             | p. Fusobacteria; c. Fusobacteriia; o. Fusobacteriales; f. Fusobacteriaceae; g. Fusobacterium                    |
|                     | Bact-6251bd9                                                                             | p. Bacteroidetes; c. Bacteroidia; o. Bacteroidales; f. Bacteroidaceae; g. Bacteroides                           |
|                     | Pept-f148c98                                                                             | p. Firmicutes; c. Clostridia; o. Clostridiales; f. Peptostreptococcaceae; g. Peptostreptococcus                 |
|                     | Faec-4516aa6                                                                             | p. Firmicutes; c. Clostridia; o. Clostridiales; f. Ruminococcaceae; g. Faecalibacterium                         |
|                     | Bact-7440aa8                                                                             | p. Bacteroidetes; c. Bacteroidia; o. Bacteroidales; f. Bacteroidaceae; g. Bacteroides                           |
|                     | Fuso-e47b7c5                                                                             | p. Fusobacteria; c. Fusobacteriia; o. Fusobacteriales; f. Fusobacteriaceae; g. Fusobacterium                    |
|                     | Fuso-7fa9543                                                                             | p. Fusobacteria; c. Fusobacteriia; o. Fusobacteriales; f. Fusobacteriaceae; g. Fusobacterium                    |
|                     | Fuso-d2f4ba7                                                                             | p. Fusobacteria; c. Fusobacteriia; o. Fusobacteriales; f. Fusobacteriaceae; g. Fusobacterium                    |
|                     | Faec-bbae6ed                                                                             | p. Firmicutes; c. Clostridia; o. Clostridiales; f. Ruminococcaceae; g. Faecalibacterium                         |
|                     | Lach-02e1e97                                                                             | p. Firmicutes; c. Clostridia; o. Clostridiales; f. Lachnospiraceae; g. Lachnospiraceae UCG-010                  |
|                     | Porp-1693b47                                                                             | p. Bacteroidetes; c. Bacteroidia; o. Bacteroidales; f. Porphyromonadaceae; g. Porphyromonas                     |
|                     | Stre-d3829c5                                                                             | p. Firmicutes; c. Bacilli; o. Lactobacillales; f. Streptococcaceae; g. Streptococcus                            |
|                     | Porp-69023d0                                                                             | p. Bacteroidetes; c. Bacteroidia; o. Bacteroidales; f. Porphyromonadaceae; g. Porphyromonas                     |
|                     | Bact-70d55ba                                                                             | p. Bacteroidetes; c. Bacteroidia; o. Bacteroidales; f. Bacteroidaceae; g. Bacteroides                           |
|                     | Fuso-62b2f8b                                                                             | p. Fusobacteria; c. Fusobacteriia; o. Fusobacteriales; f. Fusobacteriaceae; g. Fusobacterium                    |
|                     | Parv-8f3c8cb                                                                             | p. Firmicutes; c. Clostridia; o. Clostridiales; f. Family XI; g. Parvimonas                                     |
|                     | Faec-c728ad6                                                                             | p. Firmicutes; c. Clostridia; o. Clostridiales; f. Ruminococcaceae; g. Faecalibacterium                         |
|                     | Fret-2b8622a                                                                             | p. Synergistetes; c. Synergistia; o. Synergistales; f. Synergistaceae; g. Fretibacterium                        |
| Dial-08dda4f        | p. Firmicutes; c. Negativicutes; o. Selenomonadales; f. Veillonellaceae; g. Dialister    |                                                                                                                 |
| Fret-fd4122f        | p. Synergistetes; c. Synergistia; o. Synergistales; f. Synergistaceae; g. Fretibacterium |                                                                                                                 |

Supplementary Table 1 - The STORMS checklist. An editable version for adaptation and inclusion in publications is available from <https://stormsmicrobiome.org>

| Number              | Item                                | Recommendation                                                                                                                      | Item Source | Additional Guidance                                                                              | Yes/No/NA | Comments or location in manuscript |
|---------------------|-------------------------------------|-------------------------------------------------------------------------------------------------------------------------------------|-------------|--------------------------------------------------------------------------------------------------|-----------|------------------------------------|
| <b>Abstract</b>     |                                     |                                                                                                                                     |             |                                                                                                  |           |                                    |
| 1.0                 | Structured or Unstructured Abstract | Abstract should include information on background, methods, results, and conclusions in structured or unstructured format.          | STORMS      |                                                                                                  | Yes       | pg 1, abstract                     |
| 1.1                 | Study Design                        | State study design in abstract.                                                                                                     | STORMS      | See 3.0 for additional information on study design.                                              | Yes       | pg 1, abstract                     |
| 1.2                 | Sequencing methods                  | State the strategy used for metagenomic classification.                                                                             | STORMS      | For example, targeted 16S by qPCR or sequencing, shotgun metagenomics, metatranscriptomics, etc. | Yes       | pg 1, abstract                     |
| 1.3                 | Specimens                           | Describe body site(s) studied.                                                                                                      | STORMS      |                                                                                                  | Yes       | Pg 1, abstract                     |
| <b>Introduction</b> |                                     |                                                                                                                                     |             |                                                                                                  |           |                                    |
| 2.0                 | Background and Rationale            | Summarize the underlying background, scientific evidence, or theory driving the current hypothesis as well as the study objectives. | STORMS      |                                                                                                  | Yes       | Ln 3-28 (pg 2-3)                   |
| 2.1                 | Hypotheses                          | State the pre-specified hypothesis. If the study is exploratory, state any pre-specified study objectives.                          | STORMS      |                                                                                                  | Yes       |                                    |
| <b>Methods</b>      |                                     |                                                                                                                                     |             |                                                                                                  |           |                                    |

|     |              |                                                                                                                                                                                                                                                                          |        |                                                                                                                                                                                                                                                                                                                                                                                                                                                                                                                       |     |                      |
|-----|--------------|--------------------------------------------------------------------------------------------------------------------------------------------------------------------------------------------------------------------------------------------------------------------------|--------|-----------------------------------------------------------------------------------------------------------------------------------------------------------------------------------------------------------------------------------------------------------------------------------------------------------------------------------------------------------------------------------------------------------------------------------------------------------------------------------------------------------------------|-----|----------------------|
| 3.0 | Study Design | Describe the study design.                                                                                                                                                                                                                                               | STORMS | <p>Observational (Case-Control, Cohort, Cross-sectional survey, etc.) or Experimental (Randomized controlled trial, Non-randomized controlled trial, etc.). For a brief description of common study designs see: DOI: 10.11613/BM.2014.022</p> <p>If applicable, describe any blinding (e.g. single or double-blinding) used in the course of the study.</p>                                                                                                                                                          | Yes | Ln 30-35 (pg 5)      |
| 3.1 | Participants | State what the population of interest is, and the method by which participants are sampled from that population. Include relevant information on physiological state of the subjects or stage in the life history of disease under study when participants were sampled. | STORMS | <p>Examples of the population of interest could be: adults with no chronic health conditions, adults with type II diabetes, newborns, etc. This is the total population to whom the study is hoped to be generalizable to. The sampling method describes how potential participants were selected from that population.</p> <p>If the participants are from a substudy of a larger study, provide a brief description of that study and cite that study.</p> <p>Clearly state how cases and controls are defined.</p> |     | Lines 30-53 (pg 4-5) |

|     |                     |                                                                                |                                                       |                                                                                                                                                                                                                                                                                                                                                                   |     |             |
|-----|---------------------|--------------------------------------------------------------------------------|-------------------------------------------------------|-------------------------------------------------------------------------------------------------------------------------------------------------------------------------------------------------------------------------------------------------------------------------------------------------------------------------------------------------------------------|-----|-------------|
|     |                     |                                                                                |                                                       | An example of relevant physiological state might be pre/post menopausal for a vaginal microbiome study; examples of stage in the life history of disease could be whether specimens were collected during active or dormant disease, or before or after treatment.                                                                                                |     |             |
| 3.2 | Geographic location | State the geographic region(s) where participants were sampled from.           | MixS: geographic location (country and/or sea,region) | Geographic coordinates can be reported to prevent potential ambiguities if necessary.                                                                                                                                                                                                                                                                             | Yes | Lines 40-42 |
| 3.3 | Relevant Dates      | State the start and end dates for recruitment, follow-up, and data collection. | STORMS                                                | Recruitment is the period in which participants are recruited for the study. In longitudinal studies, follow-up is the date range in which participants are asked to complete a specific assessment. Finally, data collection is the total period in which data is being collected from participants including during initial recruitment through all follow-ups. |     | Lines 40-42 |



|     |                      |                                                                                                                                                                                                                                                                                                                               |                 |                                                                                                                                                                                                                                                                         |     |                                                                                               |
|-----|----------------------|-------------------------------------------------------------------------------------------------------------------------------------------------------------------------------------------------------------------------------------------------------------------------------------------------------------------------------|-----------------|-------------------------------------------------------------------------------------------------------------------------------------------------------------------------------------------------------------------------------------------------------------------------|-----|-----------------------------------------------------------------------------------------------|
| 3.4 | Eligibility criteria | List any criteria for inclusion and exclusion of recruited participants.                                                                                                                                                                                                                                                      | Modified STROBE | Among potential recruited participants, how were some chosen and others not? This could include criteria such as sex, diet, age, health status, or BMI.<br><br>If there is a primary and validation sample, describe inclusion/exclusion criteria for each.             | Yes | Lines 40-46                                                                                   |
| 3.5 | Antibiotics Usage    | List what is known about antibiotics usage before or during sample collection.                                                                                                                                                                                                                                                | STORMS          | If participants were excluded due to current or recent antibiotics usage, state this here.<br><br>Other factors (e.g. proton pump inhibitors, probiotics, etc.) that may influence the microbiome should also be described as well.                                     | Yes | Lines 40-46                                                                                   |
| 3.6 | Analytic sample size | Explain how the final analytic sample size was calculated, including the number of cases and controls if relevant, and reasons for dropout at each stage of the study. This should include the number of individuals in whom microbiome sequencing was attempted and the number in whom microbiome sequencing was successful. | STORMS          | Consider use of a flow diagram (see template at <a href="https://stormsmicrobiome.org/figures">https://stormsmicrobiome.org/figures</a> ). Also state sample size in abstract.<br><br>If power analysis was used to calculate sample size, describe those calculations. | Yes | Lines 51-53                                                                                   |
| 3.7 | Longitudinal Studies | For longitudinal studies, state how many follow-ups were conducted, describe sample size at follow-up by group or condition, and discuss any loss to follow-up.                                                                                                                                                               | STORMS          | If there is loss to follow-up, discuss the likelihood that drop-out is associated with exposures, treatments, or outcomes of interest.                                                                                                                                  | N/A | Nested case-control design with people categorized by follow up time; data was extracted from |

|     |                     |                                                                                                                                                                                                |                                                          |                                                                                                                                                                                                                                                            |     |                                               |
|-----|---------------------|------------------------------------------------------------------------------------------------------------------------------------------------------------------------------------------------|----------------------------------------------------------|------------------------------------------------------------------------------------------------------------------------------------------------------------------------------------------------------------------------------------------------------------|-----|-----------------------------------------------|
|     |                     |                                                                                                                                                                                                |                                                          |                                                                                                                                                                                                                                                            |     | Swedish death records which are very complete |
| 3.8 | Matching            | For matched studies, give matching criteria.                                                                                                                                                   | Modified STROBE                                          | "Matched" refers to matching between comparable study participants as cases and controls or exposed / unexposed.<br><br>Indicate whether participants were individual or frequency matched and in what ratio were they matched (e.g. 1 case to 1 control). | N/A | N/A<br>No matching was applied                |
| 3.9 | Ethics              | State the name of the institutional review board that approved the study and protocols, protocol number and date of approval, and procedures for obtaining informed consent from participants. | STORMS                                                   |                                                                                                                                                                                                                                                            | Yes | Lines 55 – 56                                 |
| 4.0 | Laboratory methods  | State the laboratory/center where laboratory work was done.                                                                                                                                    | STORMS                                                   | Provide a reference to complete lab protocols if previously published elsewhere such as on protocols.io. Note any modifications of lab protocols and the reason for protocol modifications.                                                                | Yes | Lines 73-79; reference 21                     |
| 4.1 | Specimen collection | State the body site(s) sampled from and how specimens were collected.                                                                                                                          | MlxS: sample collection device or method; host body site | Use terms from the Uber-anatomy Ontology ( <a href="https://www.ebi.ac.uk/ols/ontologies/uberanatomy">https://www.ebi.ac.uk/ols/ontologies/uberanatomy</a> ) to describe body sites in a standardized format.                                              | Yes | Lines 43-44; Table S1                         |

|     |                                                          |                                                                                                                                                         |                               |                                                                                                                                                  |     |             |
|-----|----------------------------------------------------------|---------------------------------------------------------------------------------------------------------------------------------------------------------|-------------------------------|--------------------------------------------------------------------------------------------------------------------------------------------------|-----|-------------|
| 4.2 | Shipping                                                 | Describe how samples were stored and shipped to the laboratory.                                                                                         | STORMS                        | Include length of time from collection to receipt by the lab and if temperature control was used during shipping.                                | Yes | Lines 40-42 |
| 4.3 | Storage                                                  | Describe how the laboratory stored samples, including time between collection and storage and any preservation buffers or refrigeration used.           | STORMS                        | State where each procedure or lot of samples was done if not all in the same place.<br><br>Include reagent/lot/catalogue #s for storage buffers. | Yes | Ref 20      |
| 4.4 | DNA extraction                                           | Provide DNA extraction method, including kit and version if relevant.                                                                                   | MlxS: nucleic acid extraction | If any DNA quantification methods were used prior to DNA amplification or at the pooling step of library preparation, state so here.             | Yes | Ref 20      |
| 4.5 | Human DNA sequence depletion or microbial DNA enrichment | Describe whether human DNA sequence depletion or enrichment of microbial or viral DNA was performed.                                                    | STORMS                        |                                                                                                                                                  | Yes | Ref 20      |
| 4.6 | Primer selection                                         | Provide primer selection and DNA amplification methods as well as variable region sequenced (if applicable).                                            | MlxS: pcr primers             |                                                                                                                                                  | Yes | Line 108    |
| 4.7 | Positive Controls                                        | Describe any positive controls (mock communities) if used.                                                                                              | STORMS                        | If used, should be deposited under guidance provided in the 8.X items.                                                                           | N/A |             |
| 4.8 | Negative Controls                                        | Describe any negative controls if used.                                                                                                                 | STORMS                        | If used, should be deposited under guidance provided in the 8.X items.                                                                           | N/A |             |
| 4.9 | Contaminant mitigation and identification                | Provide any laboratory or computational methods used to control for or identify microbiome contamination from the environment, reagents, or laboratory. | STORMS                        | Includes filtering of reagents and other steps to minimize contamination. It is relevant to state whether the                                    | N/A |             |

|      |                     |                                                                                                                                                                                                                                                                                      |                         |                                                                                                                                                                                                       |     |                                              |
|------|---------------------|--------------------------------------------------------------------------------------------------------------------------------------------------------------------------------------------------------------------------------------------------------------------------------------|-------------------------|-------------------------------------------------------------------------------------------------------------------------------------------------------------------------------------------------------|-----|----------------------------------------------|
|      |                     |                                                                                                                                                                                                                                                                                      |                         | specimens of interest have low microbial load, which makes contamination especially relevant.                                                                                                         |     |                                              |
| 4.10 | Replication         | Describe any biological or technical replicates included in the sequencing, including which steps were replicated between them.                                                                                                                                                      | STORMS                  | Replication may be biological (redundant biological specimens) or technical (aliquots taken at different stages of analysis) and used in extraction, sequencing, preprocessing, and/or data analysis. | N/A |                                              |
| 4.11 | Sequencing strategy | Major divisions of strategy, such as shotgun or amplicon sequencing.                                                                                                                                                                                                                 | MlxS: sequencing method | For amplicon sequencing (for example, 16S variable region), state the region selected. State the model of sequencer used.                                                                             | Yes | Lines 73-79                                  |
| 4.12 | Sequencing methods  | State whether experimental quantification was used (QMP/cell count based, spike-in based) or whether relative abundance methods were applied.                                                                                                                                        | STORMS                  | These include read length, sequencing depth per sample (average and minimum), whether reads are paired, and other parameters.                                                                         | N/A | See ref 20                                   |
| 4.13 | Batch effects       | Detail any blocking or randomization used in study design to avoid confounding of batches with exposures or outcomes. Discuss any likely sources of batch effects, if known.                                                                                                         | STORMS                  | Sources of batch effects include sample collection, storage, library preparation, and sequencing and are commonly unavoidable in all but the smallest of studies.                                     | N/A | All samples were sequenced in the same batch |
| 4.14 | Metatranscriptomics | Detail whether any mRNA enrichment was performed and whether/how retrotranscription was performed prior to sequencing. Provide size range of isolated transcripts. Describe whether the sequencing library was stranded or not. Provide details on sequencing methods and platforms. | STORMS                  | Provide details on any internal standards which may have been used as well as parameters and versions of any software or databases used.                                                              | N/A |                                              |

|      |                              |                                                                                                                                                                                                                                                                                                                                                                               |                                 |                                                                                                                                                                                                                                                                                                                                                                                                                                  |     |                             |
|------|------------------------------|-------------------------------------------------------------------------------------------------------------------------------------------------------------------------------------------------------------------------------------------------------------------------------------------------------------------------------------------------------------------------------|---------------------------------|----------------------------------------------------------------------------------------------------------------------------------------------------------------------------------------------------------------------------------------------------------------------------------------------------------------------------------------------------------------------------------------------------------------------------------|-----|-----------------------------|
| 4.15 | Metaproteomics               | Detail which protease was used for digestion. Provide details on proteomic methods and platforms (e.g. LC-MS/MS, instrument type, column type, mass range, resolution, scan speed, maximum injection time, isolation window, normalised collision energy, and resolution).                                                                                                    | STORMS                          | Provide details on any internal standards which may have been used as well as parameters and versions of any software or databases used.                                                                                                                                                                                                                                                                                         | N/A |                             |
| 4.16 | Metabolomics                 | Specify the analytic method used (such as nuclear magnetic resonance spectroscopy or mass spectrometry). For mass spectrometry, detail which fractions were obtained (polar and/or non-polar) and how these were analyzed. Provide details on metabolomics methods and platforms (e.g. derivatization, instrument type, injection type, column type and instrument settings). | STORMS                          | Provide details on any internal standards which may have been used as well as parameters and versions of any software or databases used.                                                                                                                                                                                                                                                                                         | N/A |                             |
| 5.0  | Data sources/<br>measurement | For each non-microbiome variable, including the health condition, intervention, or other variable of interest, state how it was defined, how it was measured or collected, and any transformations applied to the variable prior to analysis.                                                                                                                                 | MlxS: host<br>disease<br>status | State any sources of potential bias in measurements, for example multiple interviewers or measurement instruments, and whether these potential biases were assessed or accounted for in study design.<br><br>Use terms from a standardized ontology such as the Experimental Factor Ontology ( <a href="https://www.ebi.ac.uk/efo/">https://www.ebi.ac.uk/efo/</a> ) to describe variables of interest in a standardized format. | Yes | Lines 45-46,<br>Lines 60-70 |

|     |                                      |                                                                                                                                                                                                 |        |                                                                                                                                                                                                                                                                                                                                                                                                                                                                                                                                                                                                                                                                                                                                                                                          |     |                               |
|-----|--------------------------------------|-------------------------------------------------------------------------------------------------------------------------------------------------------------------------------------------------|--------|------------------------------------------------------------------------------------------------------------------------------------------------------------------------------------------------------------------------------------------------------------------------------------------------------------------------------------------------------------------------------------------------------------------------------------------------------------------------------------------------------------------------------------------------------------------------------------------------------------------------------------------------------------------------------------------------------------------------------------------------------------------------------------------|-----|-------------------------------|
| 6.0 | Research design for causal inference | Discuss any potential for confounding by variables that may influence both the outcome and exposure of interest. State any variables controlled for and the rationale for controlling for them. | STORMS | <p>For causal inference, this item refers to describing the assumptions that would be required to draw causal inferences from observational data. See Vujkovic-Cvijin, I., Sklar, J., Jiang, L. et al. Host variables confound gut microbiota studies of human disease. <i>Nature</i> 587, 448–454 (2020). <a href="https://doi.org/10.1038/s41586-020-2881-9">https://doi.org/10.1038/s41586-020-2881-9</a> for more details on confounding in observational microbiome studies.</p> <p>For example, hypothesized confounders may be controlled for by multivariable adjustment. Consider using a directed acyclic graph (DAG) to describe your causal model and justify any variables controlled for. DAGs can be made using <a href="http://www.dagitty.net">www.dagitty.net</a>.</p> | Yes | Table S1, Table S2, Figure S3 |
| 6.1 | Selection bias                       | Discuss potential for selection or survival bias.                                                                                                                                               | STORMS | Selection bias can occur when some members of the target study population are more likely to be included in the study/final analytic sample than others. Some examples include survival bias (where part of the target study population is more likely to die before they can                                                                                                                                                                                                                                                                                                                                                                                                                                                                                                            |     | Lines 40-46;                  |

|     |                                       |                                                                                                                                                                  |                                                    |                                                                                                                                                                                                                                                                                                |     |                                                   |
|-----|---------------------------------------|------------------------------------------------------------------------------------------------------------------------------------------------------------------|----------------------------------------------------|------------------------------------------------------------------------------------------------------------------------------------------------------------------------------------------------------------------------------------------------------------------------------------------------|-----|---------------------------------------------------|
|     |                                       |                                                                                                                                                                  |                                                    | be studied), convenience sampling (where members of the target study population are not selected at random), and loss to follow-up (when probability of dropping out is related to one of the things being studied).                                                                           |     |                                                   |
| 7.0 | Bioinformatic and Statistical Methods | Describe any transformations to quantitative variables used in analyses (e.g. use of percentages instead of counts, normalization, rarefaction, categorization). | STORMS                                             | If a variable is analyzed using different transformations, state rationale for the transformation and for each analyses which version of the variable is used.<br><br>In case of any complex or multistep transformations, give enumerated instructions for reproducing those transformations. | Yes | Lines 96-100; 103-105; 112-114; 118-125; 128-131. |
| 7.1 | Quality Control                       | Describe any methods to identify or filter low quality reads or samples.                                                                                         | MlxS: sequence quality check                       | If samples were excluded based on quality or read depth, list the criteria used, the number of samples excluded, and the final sample size after quality control.                                                                                                                              |     | Lines 48-53, Lines 90-92;                         |
| 7.2 | Sequence analysis                     | Describe any taxonomic, functional profiling, or other sequence analysis performed.                                                                              | MlxS: feature prediction; similarity search method |                                                                                                                                                                                                                                                                                                |     | Lines 81-92                                       |

|     |                       |                                                                                                                                                                                              |                 |                                                                                                                                                                                                                                                                                                                                                                                                                                                                  |     |                                |
|-----|-----------------------|----------------------------------------------------------------------------------------------------------------------------------------------------------------------------------------------|-----------------|------------------------------------------------------------------------------------------------------------------------------------------------------------------------------------------------------------------------------------------------------------------------------------------------------------------------------------------------------------------------------------------------------------------------------------------------------------------|-----|--------------------------------|
| 7.3 | Statistical methods   | Describe all statistical methods.                                                                                                                                                            | Modified STROBE | Describe any statistical tests used, exploratory data analysis performed, dimension reduction methods/unsupervised analysis, alpha/beta metrics, and/or methods for adjusting for measurement bias.<br><br>If multiple statistical methods are possible, discuss why the methods used were selected.<br><br>If a multiple hypothesis testing correction method was used, describe the type of correction used.<br><br>State which taxonomic levels are analyzed. |     | Lines 60-70; 145-170           |
| 7.4 | Longitudinal analysis | If the study is longitudinal, include a section that explicitly states what analysis methods were used (if any) to account for grouping of measurements by individual or patterns over time. | STORMS          |                                                                                                                                                                                                                                                                                                                                                                                                                                                                  |     | Lines 102-108; 127-143;        |
| 7.5 | Subgroup analysis     | Describe any methods used to examine subgroups and interactions.                                                                                                                             | STROBE          |                                                                                                                                                                                                                                                                                                                                                                                                                                                                  | N/A |                                |
| 7.6 | Missing data          | Explain how missing data were addressed.                                                                                                                                                     | STROBE          | "Missing data" refers to participant measurements such as covariates, exposures, outcomes, or time points that should have been collected but were not, not to zeros in taxonomic abundance tables or data                                                                                                                                                                                                                                                       | N/A | We had a case-complete dataset |



|     |                      |                                                                                                                                                                                      |                 |                                                                                                                                                                                                                                                                                                                                                  |     |                                                             |
|-----|----------------------|--------------------------------------------------------------------------------------------------------------------------------------------------------------------------------------|-----------------|--------------------------------------------------------------------------------------------------------------------------------------------------------------------------------------------------------------------------------------------------------------------------------------------------------------------------------------------------|-----|-------------------------------------------------------------|
|     |                      |                                                                                                                                                                                      |                 | points not applicable to that observation.                                                                                                                                                                                                                                                                                                       |     |                                                             |
| 7.7 | Sensitivity analyses | Describe any sensitivity analyses.                                                                                                                                                   | STROBE          |                                                                                                                                                                                                                                                                                                                                                  | N/A |                                                             |
| 7.8 | Findings             | State criteria used to select findings for reporting.                                                                                                                                | STORMS          | For example, false discovery rate with total number of tests, effect size threshold, significance threshold, microbes of interest.                                                                                                                                                                                                               | Yes | Lines 118-125; 139-143; 165                                 |
| 7.9 | Software             | Cite all software (including read mapping software) and databases (including any used for taxonomic reference or annotating amplicons, if applicable) used. Include version numbers. | Modified STREGA | <p>Installed packages, add-ons or libraries should be stated and cited in addition to the software used.</p> <p>All parameters employed that differ from the default of that software/version should be provided.</p> <p>This is in addition to, not a replacement for, publishing of code as outlined in the section Reproducible Research.</p> | Yes | Lines 81; 85-92; 99-100; 103-104; 111-112; 136-137; 166-171 |

|     |                       |                                                                                    |        |                                                                                                                                                                                                                                                                                                                                                                                                                                                                                                                                                                                                                                                                                                                                                            |     |                                                |
|-----|-----------------------|------------------------------------------------------------------------------------|--------|------------------------------------------------------------------------------------------------------------------------------------------------------------------------------------------------------------------------------------------------------------------------------------------------------------------------------------------------------------------------------------------------------------------------------------------------------------------------------------------------------------------------------------------------------------------------------------------------------------------------------------------------------------------------------------------------------------------------------------------------------------|-----|------------------------------------------------|
| 8.0 | Reproducible research | Make a statement about whether and how others can reproduce the reported analysis. | STORMS | <p>Any protected information that has been excluded or provided under controlled access should be listed along with any relevant data access procedures. "On request from authors" is not sufficiently detailed; formal data access procedures and conditions should be defined.</p> <p>If data are unavailable, state so clearly.</p> <p>Consider using a specialized rubric for reproducible research (such as: <a href="https://mbio.asm.org/content/9/3/e00525-18.short">https://mbio.asm.org/content/9/3/e00525-18.short</a>).</p> <p>Consider preregistering the study protocol (such as on <a href="https://osf.io">osf.io</a> or <a href="https://plos.org/open-science/preregistration/">https://plos.org/open-science/preregistration/</a>).</p> | Yes | See code and data availability (lines 362-367) |
| 8.1 | Raw data access       | State where raw data may be accessed including demultiplexing information.         | STORMS | Robust, long-term databases such as those hosted by NCBI and EBI are preferred. If using a private repository, provide rationale.                                                                                                                                                                                                                                                                                                                                                                                                                                                                                                                                                                                                                          |     | ENA accession PRJEB57580                       |

|     |                         |                                                                                                                                                        |        |                                                                                                                                                                                                                                                                                                                                                                                                                                                                                             |     |                                                          |
|-----|-------------------------|--------------------------------------------------------------------------------------------------------------------------------------------------------|--------|---------------------------------------------------------------------------------------------------------------------------------------------------------------------------------------------------------------------------------------------------------------------------------------------------------------------------------------------------------------------------------------------------------------------------------------------------------------------------------------------|-----|----------------------------------------------------------|
| 8.2 | Processed data access   | State where processed data may be accessed.                                                                                                            | STORMS | <p>Unfiltered data should be provided.</p> <p>Robust, long-term databases such as those hosted by NCBI and EBI-EMBL are preferred. Repositories like zenodo (<a href="https://zenodo.org/">https://zenodo.org/</a>) or publisso (<a href="https://www.publisso.de/en/working-for-you/doi-service/">https://www.publisso.de/en/working-for-you/doi-service/</a>) can be used to provide a DOI and long-term storage for processed datasets, even those which cannot be published openly.</p> | N/A | doi: 10.5281/zenodo.7325431                              |
| 8.3 | Participant data access | State where individual participant data such as demographics and other covariates may be accessed, and how they can be matched to the microbiome data. | STORMS | <p>If re-categorized, transformed, or otherwise derived variables were used in the analysis, these variables or code for deriving them should be provided.</p> <p>Examples of how participant data can be matched to microbiome data are: using the same set of anonymized identifiers, or using different anonymized identifiers but providing a map.</p> <p>Provided data should be sufficient to independently replicate the current analysis.</p>                                       | N/A | doi: 10.5281/zenodo.7325431 and ENA accession PRJEB57580 |

|                |                    |                                                                                                                                                  |        |                                                                                                                                                                                                                                                                                                                                                                                                                                                                |     |                                                         |
|----------------|--------------------|--------------------------------------------------------------------------------------------------------------------------------------------------|--------|----------------------------------------------------------------------------------------------------------------------------------------------------------------------------------------------------------------------------------------------------------------------------------------------------------------------------------------------------------------------------------------------------------------------------------------------------------------|-----|---------------------------------------------------------|
| 8.4            | Source code access | State where code may be accessed.                                                                                                                | STORMS | If a standard or formalized workflow was employed, reference it here.                                                                                                                                                                                                                                                                                                                                                                                          | N/A | See code and data availability statement; lines 362-367 |
| 8.5            | Full results       | Provide full results of all analyses, in computer-readable format, in supplementary materials.                                                   | STORMS | For example, any fold-changes, p-values, or FDR values calculated, provided as a spreadsheet.<br><br>Use a machine-readable, plain-text format such as csv or tsv.                                                                                                                                                                                                                                                                                             | Yes | See supplemental material                               |
| <b>Results</b> |                    |                                                                                                                                                  |        |                                                                                                                                                                                                                                                                                                                                                                                                                                                                |     |                                                         |
| 9.0            | Descriptive data   | Give characteristics of study participants (e.g. dietary, demographic, clinical, social) and information on exposures and potential confounders. | STROBE | Typically reported in a table included in the paper or as a supplementary table. Indicate number of participants with missing data for each variable of interest.<br><br>This includes environmental and lifestyle factors that may affect the relationship between the microbiome and the condition of interest. Participant diet and medication use should be summarized, if known.<br><br>At minimum, age and sex of all participants should be summarized. |     | Table S1                                                |

|      |                        |                                                                                                                                                                                        |        |                                                                                                                                                                                                                                                                                                                                                                                      |      |                                                                           |
|------|------------------------|----------------------------------------------------------------------------------------------------------------------------------------------------------------------------------------|--------|--------------------------------------------------------------------------------------------------------------------------------------------------------------------------------------------------------------------------------------------------------------------------------------------------------------------------------------------------------------------------------------|------|---------------------------------------------------------------------------|
| 10.0 | Microbiome data        | Report descriptive findings for microbiome analyses with all applicable outcomes and covariates.                                                                                       | STORMS | This includes measures of diversity as well as relative abundances. These descriptive findings should be reported both for the sample overall and for individual groups.                                                                                                                                                                                                             |      | Table S2, Figures S1, S3                                                  |
| 10.1 | Taxonomy               | Identify taxonomy using standardized taxon classifications that are sufficient to uniquely identify taxa.                                                                              | STORMS | If not using full taxonomic hierarchy, make sure it is clear whether names stated are species, genera, family, etc.<br><br>Italicize genus/species pairs. Consult journal guidelines or standardized references on taxonomic nomenclature. For instance, <a href="https://wwwnc.cdc.gov/eid/page/scientific-nomenclature">https://wwwnc.cdc.gov/eid/page/scientific-nomenclature</a> | Yes; | Throughout manuscript                                                     |
| 10.2 | Differential abundance | Report results of differential abundance analysis by the variable of interest and (if applicable) by time, clearly indicating the direction of change and total number of taxa tested. | STORMS | If there are more than two groups, include omnibus (multigroup) test results if applicable to the research question.<br><br>If applicable, reported effect sizes should include a measure of uncertainty such as the confidence interval.                                                                                                                                            | N/A  | See ALR statistics; we did not perform per-feature differential abundance |
| 10.3 | Other data types       | Report other data analyzed--e.g. metabolic function, functional potential, MAG assembly, and RNAseq.                                                                                   | STORMS |                                                                                                                                                                                                                                                                                                                                                                                      | N/A  |                                                                           |

|      |                            |                                                         |        |                                                                                                                                                                                                                                                                                            |     |                                      |
|------|----------------------------|---------------------------------------------------------|--------|--------------------------------------------------------------------------------------------------------------------------------------------------------------------------------------------------------------------------------------------------------------------------------------------|-----|--------------------------------------|
| 10.4 | Other statistical analysis | Report any statistical data analysis not covered above. | STORMS | <p>This could include subgroup analysis, sensitivity analyses, and cluster analysis.</p> <p>Visualizations should be easily interpretable and colorblind-friendly. The caption and/or main text should provide a detailed description of visualizations for visually-impaired readers.</p> | Yes | Figures 1-3; Figures S4; Table S3-S7 |
|------|----------------------------|---------------------------------------------------------|--------|--------------------------------------------------------------------------------------------------------------------------------------------------------------------------------------------------------------------------------------------------------------------------------------------|-----|--------------------------------------|

## Discussion

|      |                |                                                                                                                                                                             |        |                                                                                                                                                                                                                                                                                                                                                                                                                                                                                                        |     |               |
|------|----------------|-----------------------------------------------------------------------------------------------------------------------------------------------------------------------------|--------|--------------------------------------------------------------------------------------------------------------------------------------------------------------------------------------------------------------------------------------------------------------------------------------------------------------------------------------------------------------------------------------------------------------------------------------------------------------------------------------------------------|-----|---------------|
| 11.0 | Key results    | Summarise key results with reference to study objectives                                                                                                                    | STROBE |                                                                                                                                                                                                                                                                                                                                                                                                                                                                                                        | Yes | Lines 269-280 |
| 12.0 | Interpretation | Give a cautious overall interpretation of results considering objectives, limitations, multiplicity of analyses, results from similar studies, and other relevant evidence. | STROBE | <p>Define or clarify any subjective terms such as "dominant," "dysbiosis," and similar words used in interpretation of results.</p> <p>When interpreting the findings, consider how the interpretation of the findings may be summarized or quoted for the general public such as in press releases or news articles.</p> <p>If causal language is used in the interpretation (such as "alters," "affects," "results in," "causes," or "impacts"), assumptions made for causal inference should be</p> | Yes |               |

|                          |                     |                                                                                                 |        |                                                                                                                                                                                                                                  |     |         |
|--------------------------|---------------------|-------------------------------------------------------------------------------------------------|--------|----------------------------------------------------------------------------------------------------------------------------------------------------------------------------------------------------------------------------------|-----|---------|
|                          |                     |                                                                                                 |        | explicitly stated as part of 6.0 and 13.0.<br><br>Distinguish between function potential (ie inferred from metagenomics) and observed activity (ie metatranscriptomic, metabolomic, proteomic) if discussing microbial function. |     |         |
| 13.0                     | Limitations         | Discuss limitations of the study, taking into account sources of potential bias or imprecision. | STROBE | Also consider limitations resulting from the methods (especially novel methods), the study design, and the sample size.                                                                                                          | Yes | 335-350 |
| 13.1                     | Bias                | Discuss any potential for bias to influence study findings.                                     | STORMS | May include sampling method, representativeness of study participants, or potential confounding.                                                                                                                                 |     | 335-350 |
| 13.2                     | Generalizability    | Discuss the generalisability (external validity) of the study results                           | STROBE | To what populations or other settings do you expect the conclusions to generalize?                                                                                                                                               |     | 335-350 |
| 14.0                     | Ongoing/future work | Describe potential future research or ongoing research based on the study's findings.           | STORMS |                                                                                                                                                                                                                                  |     | 353-359 |
| <b>Other information</b> |                     |                                                                                                 |        |                                                                                                                                                                                                                                  |     |         |

|      |                       |                                                                                                                                                               |        |                                                                                                                                                                                                                                                                                                                       |  |                           |
|------|-----------------------|---------------------------------------------------------------------------------------------------------------------------------------------------------------|--------|-----------------------------------------------------------------------------------------------------------------------------------------------------------------------------------------------------------------------------------------------------------------------------------------------------------------------|--|---------------------------|
| 15.0 | Funding               | Give the source of funding and the role of the funders for the present study and, if applicable, for the original study on which the present article is based | STROBE |                                                                                                                                                                                                                                                                                                                       |  | 371-377                   |
| 15.1 | Acknowledgements      | Include acknowledgements of those who contributed to the research but did not meet criteria for authorship.                                                   | STORMS | For general guidelines on authorship, see <a href="http://www.icmje.org">http://www.icmje.org</a> and <a href="https://www.elsevier.com/authors/journal-authors/policies-and-ethics/credit-author-statement">https://www.elsevier.com/authors/journal-authors/policies-and-ethics/credit-author-statement</a>         |  | 364-370                   |
| 15.2 | Conflicts of Interest | Include a conflicts of interest statement.                                                                                                                    | STORMS |                                                                                                                                                                                                                                                                                                                       |  | 385-387                   |
| 16.0 | Supplements           | Indicate where supplements may be accessed and what materials they contain.                                                                                   | STORMS |                                                                                                                                                                                                                                                                                                                       |  | pg 32                     |
| 17.0 | Supplementary data    | Provide supplementary data files of results with for all taxa and all outcome variables analyzed. Indicate the taxonomic level of all taxa.                   | STORMS | Depending on the analysis performed, examples of the supplemental results included could be mean relative abundance, differential abundance, raw p-value, multiple hypothesis testing-adjusted p-values, and standard error.<br><br>All discussed taxa should include the taxonomic level (e.g. class, order, genus). |  | See supplemental material |



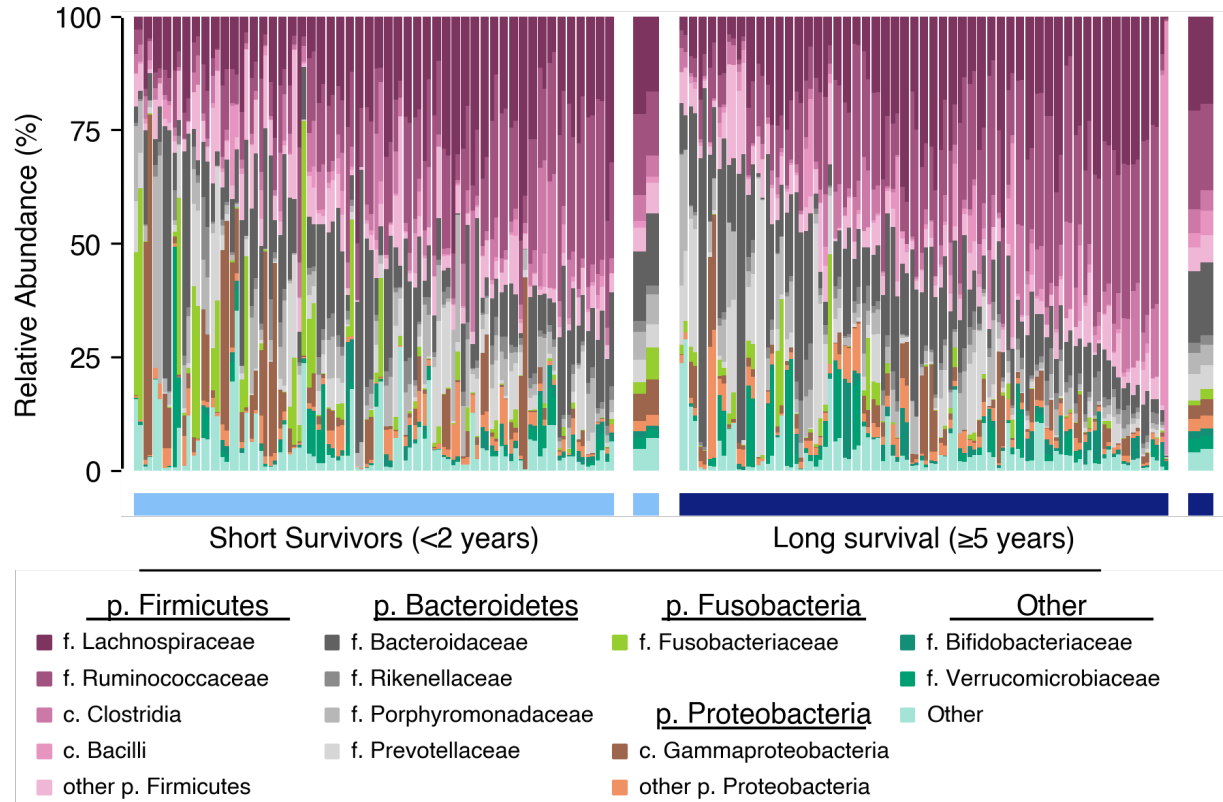

**Figure S1. A family level view of the microbiome**

Samples are sorted by individual donor with the normal tissue on the left and tumor on the right. Data is colored by taxonomic group (p: phylum level; c: class; f: family). The wide bars to the right of each distribution group show the average of the normal (left) and tumor (right) for all samples in the survival group.

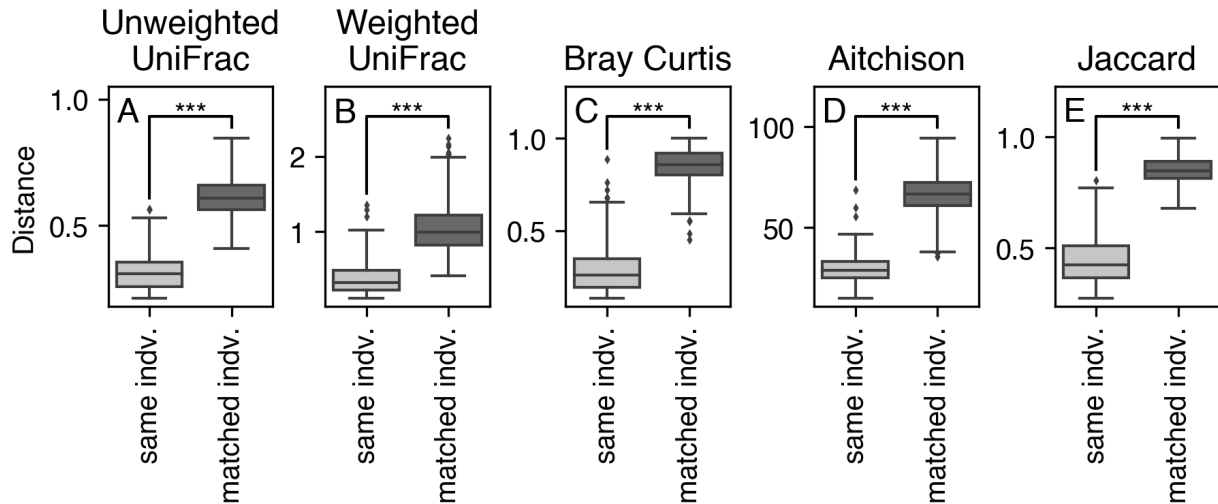

**Figure S2. There is a strong individual effect on the microbiome**

Beta diversity measured with (A) unweighted and (B) weighted UniFrac distances, (C) Bray Curtis dissimilarity, (D) Aitchison Distance, and (E) Binary Jaccard distance show within individual paired sample distances compared to the distance other samples matched on tissue type, anatomical location, surgery year, and survival. P-value from permutative t-test with 999 permutations; \*\*\* $p=0.001$ , \*\* $p \leq 0.01$ , \* $p \leq 0.05$ .

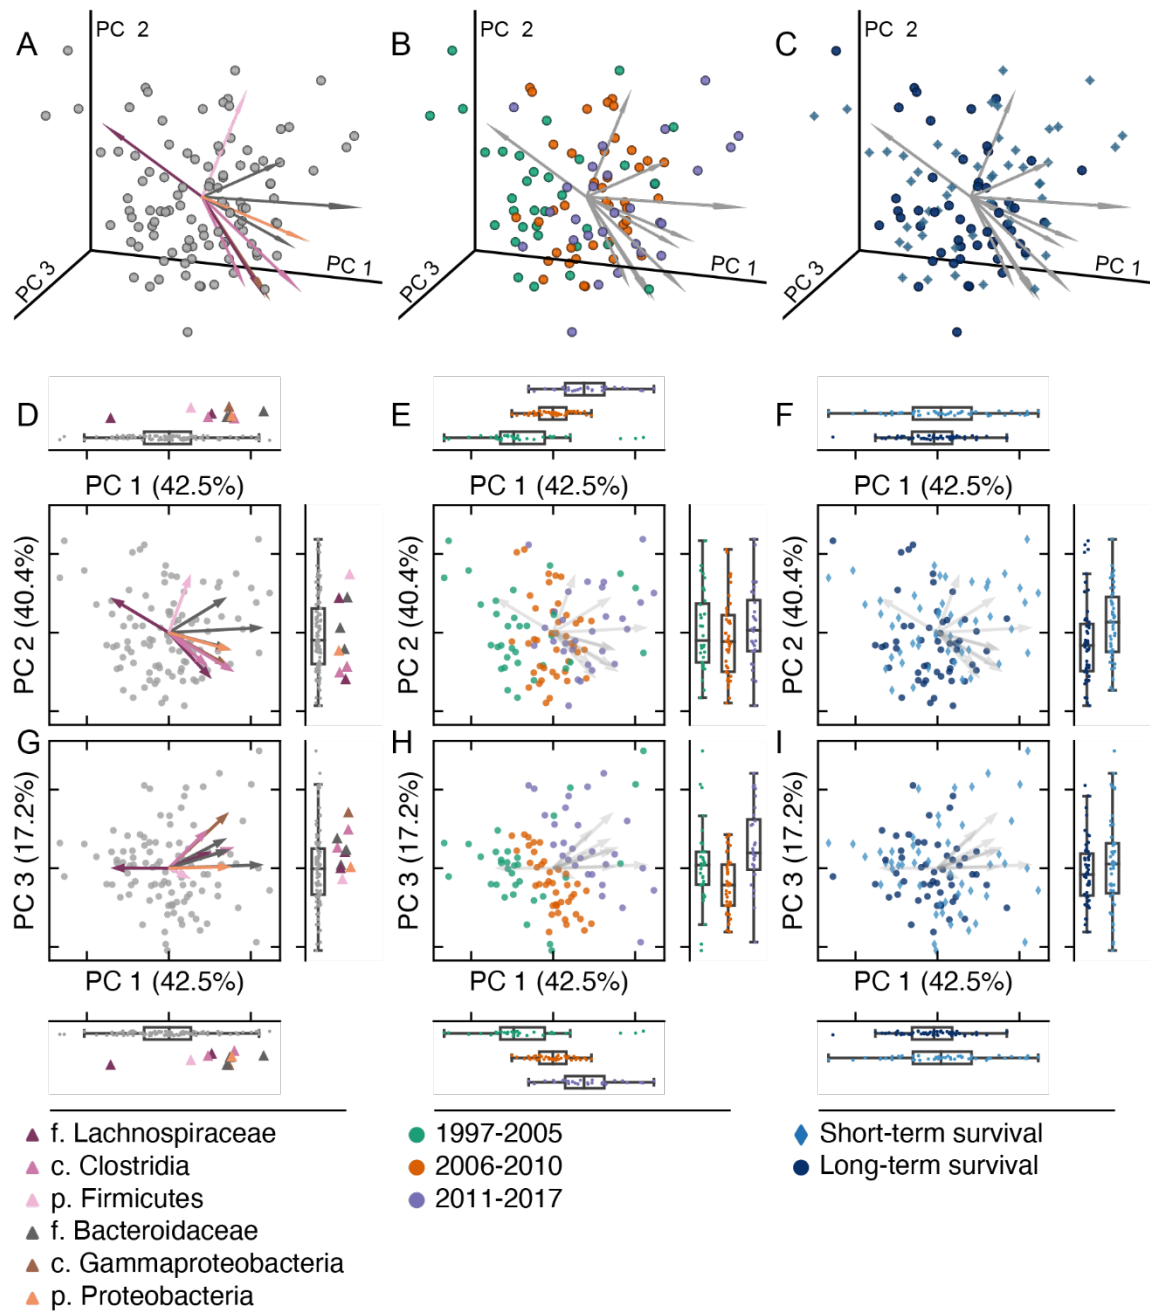

**Figure S3. Metadata predictors of the microbiome in Compositional Tensor Factorization.**

Ordination plots show (A-C) three-dimension PCA projection plots, (D-F) PC 1 vs PC 2 and (G-I) PC 2 vs PC 3 for the per-subject ordination. Plots show (A,D,G) biplot features, (B,E,H) the period of surgery, and (C,F,I) the survival. Marginal axes show the distribution of samples along their respective axes.

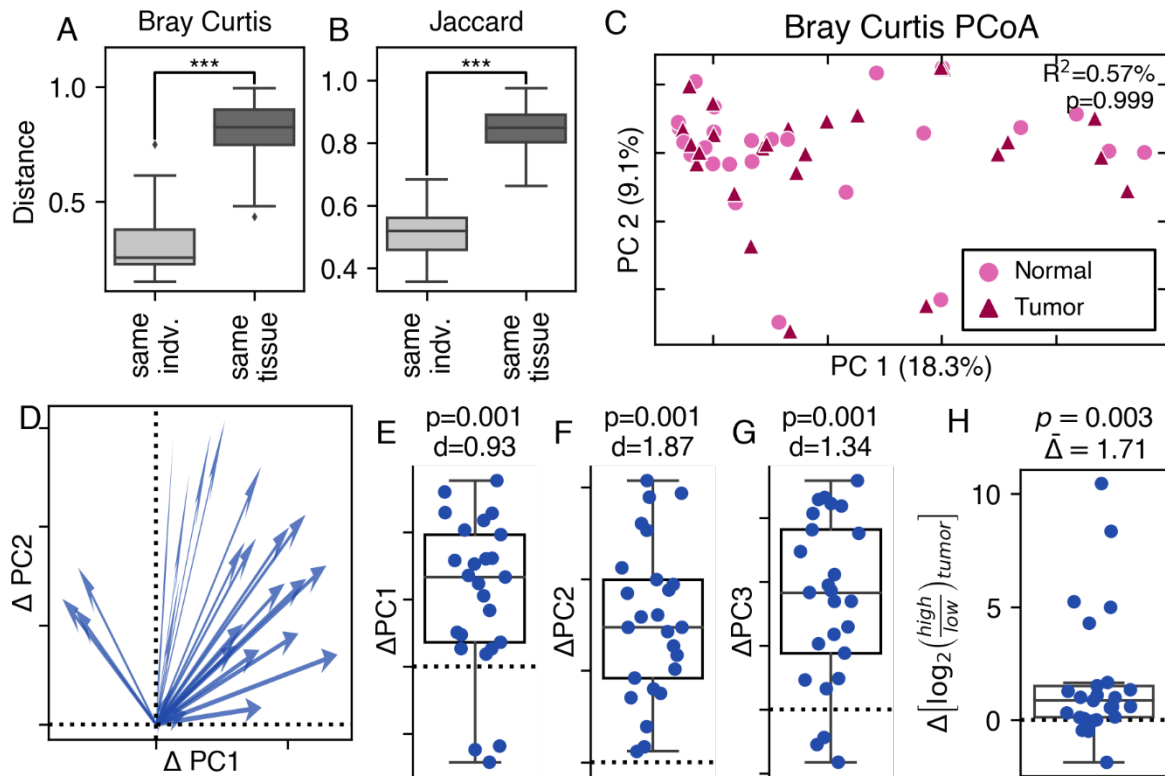

**Figure S4. Subject aware techniques detect a consistent between tissue types and replicate associated taxa.**

We compared paired samples from 25 Irish colorectal cancer patients. (A,B) Paired samples from the same individual had more similar microbiomes than samples of the same tissue (tumor or normal tissue) from other individuals. The difference was tested with a permutative t-test: \* $p \leq 0.05$ , \*\* $p \leq 0.01$ , \*\*\* $p = 0.001$ , 999 permutations. (C) We performed a principal coordinates analysis to compare the global centroids of paired normal (light pink circles) and tumor (dark pink triangles) samples. The variance explained and p-value were calculated using an unadjusted permanova with 999 permutations. (D-G) The use of a subject-aware CTF ordination shows a clear difference in the microbiome between paired tissue samples from the same individual along all three PCs. (D) A common, directional change can be seen along PC 1 and PC2 when the difference between normal tissue and tumor tissue is plotted as a vector. The difference between normal- and tumor tissue can also be observed along individual components: (E) PC 1, (F) PC 2, and (G) PC 3. Ticks and dashed zero-lines along PC 1 (E) and PC 2 (F) match the two-dimensional axes in (D). All boxplots are shown with a Cohen's d effect size statistic for a one-sided t-test and p-values from a permutative one sample t-test, 999 permutations. (H) There is a change in the tissue associated ALR in our replication cohort between tissue types. The replication data was fit to reference sequences from the original cohort; the relationship between the tissue type and ALR was modeled using a linear mixed effects model treating the individual as a random intercept. The data is labeled with the estimated coefficient and parametric p-value.

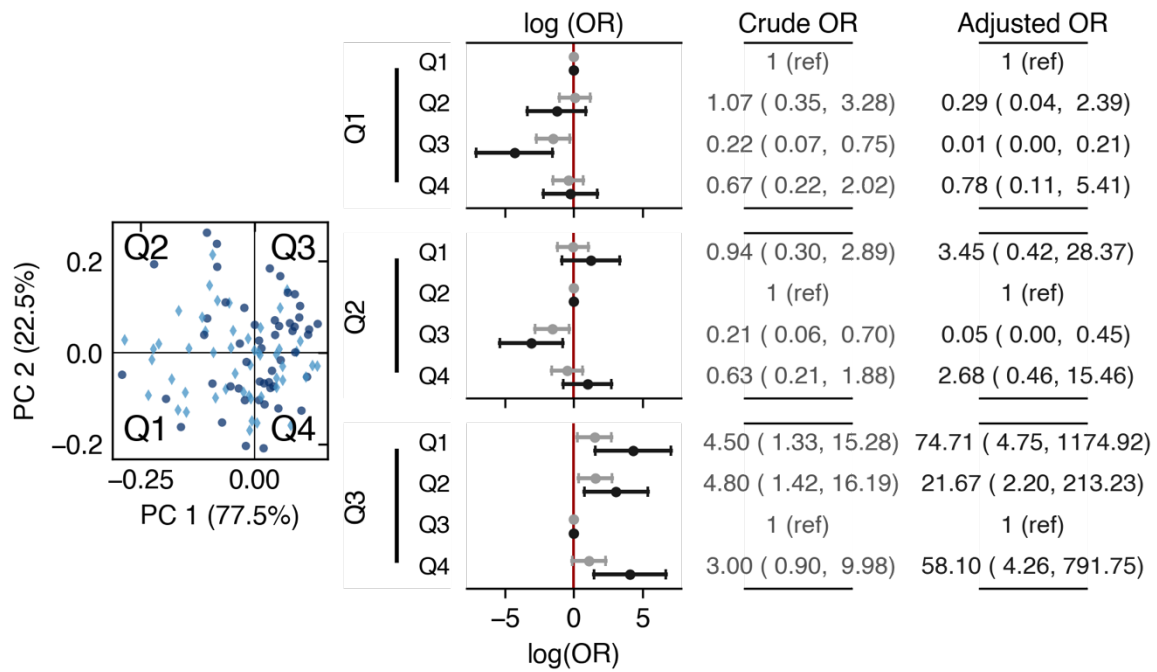

**Figure S4. Survival separates individuals by tumor-associated rPCA quadrant**  
 Left shows the quadrants in the rPCA space. Middle plot shows the log odds ratio (OR) for pairwise quadrants with 95% CI. Negative log OR indicates long survival, positive values indicate short survival. Red line indicates 0. Right shows the OR for the crude (light gray) and adjusted (dark gray) of short survival. The Adjusted OR is adjusted for age, sex, ASA score, tumor location, surgery year, TNM stage, and grade of differentiation.
